# Supplementary material for: Alkynylation of N-(3-iodopyridin-2-yl)sulfonamide under Pd/C–Cu catalysis: a direct one pot synthesis of 7-azaindoles and their pharmacological evaluation as potential inhibitors of sirtuins
Source: Royal Society of Chemistry journal article supplement (doi:10.1039/c1md00029b), 2011-01-01
Supplement: c1md00029b.pdf [file c1md00029b.pdf]

## Electronic supporting information

### **Alkynylation of *N*-(3-iodopyridin-2-yl)sulfonamide under Pd/C-Cu catalysis: A direct one pot synthesis of 7-azaindoles and their pharmacological evaluation as potential inhibitors of sirtuins**

Mohosin Layek,<sup>a,b</sup> Syam Kumar Y.,<sup>a</sup> Aminul Islam,<sup>a</sup> Ravikumar Karavarapu,<sup>c</sup> Amrita Sengupta,<sup>c</sup> Devyani Halder,<sup>c</sup> K. Mukkanti,<sup>b</sup> Manojit Pal<sup>c,\*</sup>

<sup>a</sup>*Dr. Reddy's Laboratories Ltd, Bollaram Road, Miyapur, Hyderabad 500049; India.*

<sup>b</sup>*Chemistry Division, Institute of Science and Technology, JNT University, Kukatpally, Hyderabad 500072; India*

<sup>c</sup>*Institute of Life Sciences, University of Hyderabad Campus, Gachibowli, Hyderabad 500 046, Andhra Pradesh, India*

15

20

25

30

35

## Experimental

### Chemistry

**General methods:** Unless stated otherwise, reactions were performed under nitrogen atmosphere using oven dried glassware. Reactions were monitored by thin layer chromatography (TLC) on silica gel plates (60 F254), visualizing with ultraviolet light or iodine spray. Flash chromatography was performed on silica gel (230-400 mesh) using distilled hexane, ethyl acetate, dichloromethane.  $^1\text{H}$  NMR and  $^{13}\text{C}$  NMR spectra were determined in  $\text{CDCl}_3$  solution by using 400 and 50 MHz spectrometers, respectively. Proton chemical shifts ( $\delta$ ) are relative to tetramethylsilane (TMS,  $\delta = 0.00$ ) as internal standard and expressed in ppm. Spin multiplicities are given as s (singlet), d (doublet), t (triplet) and m (multiplet) as well as b (broad). Coupling constants ( $J$ ) are given in hertz. Infrared spectra were recorded on a FT-IR spectrometer. Melting points were determined using melting point apparatus and are uncorrected. MS spectra were obtained on a mass spectrometer. High-resolution mass spectra (HRMS) were recorded using electron ionization (EI) mass spectrometry.

**Preparation of methyl 2-(4-ethynylbenzamido)-2-phenylacetate<sup>1</sup> (2g):** A solution of phenylglycine methyl ester hydrochloride (911 mg, 1.2 equiv.) in water was basified with a saturated solution of  $\text{NaHCO}_3$  and then extracted with  $\text{CH}_2\text{Cl}_2$  (3 x 20 mL). The organic layers were collected, combined, dried over anhydrous  $\text{Na}_2\text{SO}_4$ , filtrated and concentrated under a reduced pressure. The residue was dissolved in dry  $\text{CH}_2\text{Cl}_2$  (30 mL) to which was added 1-ethyl-3-(3-dimethylaminopropyl)carbodiimide hydrochloride (EDC.HCl, 867 mg, 1.2 equiv.), 1-hydroxybenzotriazole (HOBt, 608 mg, 1.2 equiv.) and 4-ethynylbenzoic acid<sup>31</sup> (550 mg, 1.0 equiv.). The resulting suspension was stirred and monitored by TLC. After completion of the reaction, the mixture was washed with water (30 mL), 1M HCl solution (30 mL), water (30 mL) and a saturated solution of  $\text{NaHCO}_3$  (15 mL). The combined organic layers were dried over anhydrous  $\text{Na}_2\text{SO}_4$ , filtered and concentrated under a reduced pressure. The crude product was purified by column chromatography on silica gel using hexane/ethyl acetate (3:1) as eluent to give the desired product (980 mg, 89% yield); mp 149-151 °C;  $^1\text{H}$  NMR (500 MHz,  $\text{CDCl}_3$ )  $\delta$ : 7.77 (d,  $J = 8.3$  Hz, 2H), 7.53 (d,  $J = 8.2$  Hz, 2H), 7.34-7.45 (m, 5H), 5.75 (d,  $J = 6.9$  Hz, 1H), 3.76 (s, 3H), 3.21 (s, 1H);  $^{13}\text{C}$  NMR (50 MHz,  $\text{CDCl}_3$ )  $\delta$ : 52.9, 56.8, 79.7, 82.6, 125.7, 127.1 (2C), 127.3 (2C), 128.6, 129.0 (2C), 132.2 (2C), 133.4, 136.3, 165.7, 171.4.

**Preparation of methyl 2-(4-ethynylbenzamido)-3-methylbutanoate (2h):** This compound was prepared in 65% yield by using Leucine methyl ester hydrochloride and 4-ethynylbenzoic acid

according to a similar procedure described above; mp 60-62 °C; <sup>1</sup>H NMR (500 MHz, CDCl<sub>3</sub>) δ: 0.98-1.01 (m, 6H), 2.26-2.28 (m, 1H), 3.21 (s, 1H), 3.78 (s, 3H), 4.76-4.78 (m, 1H), 6.66 (d, *J* = 8.5 Hz, 1H), 7.55 (d, *J* = 8.0 Hz, 2H), 7.76 (d, *J* = 8.0 Hz, 2H); <sup>13</sup>C NMR (50 MHz, CDCl<sub>3</sub>) δ 17.9, 18.9, 31.4, 52.1, 57.5, 79.6, 82.6, 125.4, 126.9 (2C), 132.1 (2C), 133.9, 166.4, 172.5.

**5 Preparation of N-(3-iodopyridin-2-yl)benzene sulfonamide<sup>2</sup> (1):** To a solution 2-amino-3-iodo pyridine (5.0 g) in pyridine (75 mL), benzenesulfonyl chloride (3.3 mL) was added at 25-35 °C. Reaction mixture was stirred under nitrogen atmosphere at 80 °C for 20 h. The reaction solution was then poured into a saturated aqueous NaHCO<sub>3</sub> solution, extracted with dichloromethane, dried over anhydrous magnesium sulfate, filtered and concentrated under reduced pressure. The crude  
10 bis(benzenesulfonyl) product obtained was dissolved in 1:1 methanol/dioxane (150 mL) and an aqueous solution of 1N KOH (50 mL) was added at 25-35 °C. The mixture was stirred at 60 °C for 1 h. The mixture was then poured into a saturated aqueous NaHCO<sub>3</sub> solution, extracted with dichloromethane, dried over anhydrous magnesium sulfate, filtered and concentrated under reduced pressure. The residue was purified by column chromatography on silica gel using 30%  
15 hexane-ethylacetate to afford the desired product as white solid (4 g, 49% yield); mp 151-153 °C; *R<sub>f</sub>* 0.3 (25% EtOAc / n-hexane); <sup>1</sup>H NMR (CDCl<sub>3</sub>, 400 MHz) δ 10.3 (bs, 1H), 8.4-8.13 (m, 4H), 7.79-7.56 (m, 3H), 6.53 (t, *J* = 7.5 Hz, 1H); <sup>13</sup>C NMR (CDCl<sub>3</sub>, 50 MHz) δ 80.5, 126.8, 129.4 (6C), 132.8, 142.8, 151.8; IR (cm<sup>-1</sup>, KBr) 3173, 3020, 2924, 1619, 1574, 1381, 1128 Mass (ES) *m/z* 361.1 (M+1, 100 %)

**20 Preparation of N-(3-iodopyridin-2-yl)methanesulfonamide<sup>2</sup> (1b):** This compound was prepared from 2-amino-3-iodo pyridine (5.0 g) using methanesulfonyl chloride (2.0 mL) in pyridine (25 mL) according to a similar procedure as described above. This compound was isolated as yellow solid (3.7 g, 55% yield); mp 140-142 °C; *R<sub>f</sub>* 0.3 (30% EtOAc / n-hexane); <sup>1</sup>H NMR (CDCl<sub>3</sub>, 400 MHz) δ 8.31 (d, *J* = 3.6 Hz, 1H), 8.03 (d, *J* = 7.2 Hz, 1H), 6.75 (t, *J* = 6.8 Hz, 1H), 3.5 (s, 3H);  
25 <sup>13</sup>C NMR (CDCl<sub>3</sub>, 200 MHz) δ 42.3, 81.6, 119.4, 128.9, 148.1, 151.0 ; IR (cm<sup>-1</sup>, KBr) 3237, 3020, 2925, 1573, 1455, 1318, 1150; Mass (ES) *m/z* 299 (M+1, 100 %).

**General method for the preparation of 2-substituted-7-azaindole (3):** A mixture of compound **1** (300 mg, 0.832 mmol), 10% Pd/C (26.55 mg, 0.025 mmol), PPh<sub>3</sub> (26.18 mg, 0.099 mmol), CuI (9.5 mg, 0.049 mmol) and 2-aminoethanol (152.45 mg, 2.495 mmol) in acetonitrile (6 mL) was  
30 stirred at 25 °C for 1 h under nitrogen. The acetylenic compound **2** (1.247 mmol) was added and the mixture was stirred at 80 °C for the time mentioned in Table 2. After completion, the reaction mixture was cooled to room temperature, diluted with EtOAc (12 mL) and filtered through a celite

bed. The filtrate was concentrated and the residue was purified by column chromatography on silica gel using hexane-ethyl acetate to afford the desired product.

**2-Phenyl-1-(phenylsulfonyl)-1H-pyrrolo[2,3-b]pyridine (3a)**: Light yellow solid, mp 103-106 °C;  $R_f$  (15% ethyl acetate / n-hexane), 0.3;  $^1\text{H}$  NMR ( $\text{CDCl}_3$ , 400 MHz)  $\delta$  8.47 (dd,  $J = 3.6, 1.2$  Hz, 1H), 7.87 (d,  $J = 7.6$  Hz, 2H), 7.77 (dd,  $J = 6.8, 1.2$  Hz, 1H), 7.56-7.36 (m, 8H), 7.18 (dd,  $J = 4.8, 2.8$  Hz, 1H), 6.51 (s, 1H);  $^{13}\text{C}$  NMR ( $\text{CDCl}_3$ , 50 MHz)  $\delta$  109.2, 119.6, 122.4, 127.6 (4C), 128.6 (4C), 128.7, 128.9, 129.8, 132.5, 133.6, 138.5, 142.2, 144.6; IR ( $\text{cm}^{-1}$ , KBr) 3060, 2924, 1397, 1376, 1187; Mass (ES) :  $m/z$  335 ( $M+1$ , 100%); HRMS (ESI): calcd for  $\text{C}_{19}\text{H}_{15}\text{N}_2\text{O}_2\text{S}$  ( $M+H$ ) $^+$  335.0854, found 335.0846.

**(1-(Phenylsulfonyl)-1H-pyrrolo [2,3-b]pyridin-2-yl) methanol (3b)**: White solid, mp 100-102 °C;  $R_f$  (40% ethyl acetate / n-hexane), 0.3;  $^1\text{H}$  NMR ( $\text{CDCl}_3$ , 400 MHz)  $\delta$  8.38 (dd,  $J = 5.2, 1.6$  Hz, 1H), 8.16 (t,  $J = 7.2, 1.2$  Hz, 2H), 7.77 (dd,  $J = 8, 1.6$  Hz, 1H), 7.60 - 7.46 (m, 3H), 7.14 (dd,  $J = 7.6, 4.8$  Hz, 1H), 6.59 (s, 1H), 5.00 (d,  $J = 5.6$  Hz, 2H), 3.19 (bs, 1H);  $^{13}\text{C}$  NMR ( $\text{CDCl}_3$ , 50 MHz)  $\delta$  58.8, 107.0, 119.2, 121.1, 127.7 (2C), 128.9 (2C), 129.2, 134.0, 138.5, 140.7, 144.7, 148.9; IR ( $\text{cm}^{-1}$ , KBr) 3293, 2922, 1399, 1375, 1178; Mass (ES)  $m/z$  289 ( $M+1$ , 100 %); HRMS (ESI): calcd for  $\text{C}_{14}\text{H}_{13}\text{N}_2\text{O}_3\text{S}$  ( $M+H$ ) $^+$  289.0647, found 289.0634.

**2-(1-(Phenylsulfonyl)-1H-pyrrolo[2,3-b]pyridin-2-yl)ethanol (3c)**: Yellow liquid;  $R_f$  (50% ethyl acetate / n-hexane), 0.3;  $^1\text{H}$  NMR ( $\text{CDCl}_3$ , 400 MHz)  $\delta$  8.35 (dd,  $J = 4.8, 1.6$  Hz, 1H), 8.11 (t,  $J = 7.6$  Hz, 2H), 7.70 (dd,  $J = 7.6, 1.2$  Hz, 1H), 7.56-7.43 (m, 3H), 7.12 (dd,  $J = 8, 4.8$  Hz, 1H), 6.46 (s, 1H), 4.08 (t,  $J = 5.6$  Hz, 2H), 3.73 (t,  $J = 5.2$  Hz, 1H), 3.42 (t,  $J = 5.6$  Hz, 2H);  $^{13}\text{C}$  NMR ( $\text{CDCl}_3$ , 50 MHz)  $\delta$  32.8, 61.5, 106.6, 119.1, 121.6, 127.6 (2C), 128.2, 128.9(2C), 133.8, 139.0, 139.2, 143.9, 149.1; IR ( $\text{cm}^{-1}$ , KBr) 3426, 2923, 1655, 1375, 1159, 1030; Mass (ES)  $m/z$  303 ( $M+1$ , 100 %); HRMS (ESI): calcd for  $\text{C}_{15}\text{H}_{15}\text{N}_2\text{O}_3\text{S}$  ( $M+H$ ) $^+$  303.0803, found 303.0797.

**1-(1-(Phenylsulfonyl)-1H-pyrrolo[2,3-b]pyridin-2-yl)ethanol (3d)**: Yellow solid, mp 120-122 °C;  $R_f$  (50% ethyl acetate / n-hexane), 0.3;  $^1\text{H}$  NMR ( $\text{CDCl}_3$ , 400 MHz)  $\delta$  8.36 (dd,  $J = 4.8, 1.6$  Hz, 1H), 8.14 (t,  $J = 7.6$  Hz, 2H), 7.58-7.44 (m, 4H), 7.16-7.13 (m, 1H), 6.63 (s, 1H), 5.51 (q,  $J = 6.4, 6$  Hz, 1H), 3.54 (bs, 1H), 1.72 (d,  $J = 6.4$  Hz, 3H);  $^{13}\text{C}$  NMR ( $\text{CDCl}_3$ , 50 MHz)  $\delta$  21.4, 62.6, 104.7, 119.3, 121.0, 127.8 (2C), 128.9, 129.1, 133.9, 138.7, 144.8, 145.4, 146.9, 149.2; IR ( $\text{cm}^{-1}$ , KBr) 3468, 2963, 2924, 1369, 1176; Mass (ES)  $m/z$  303 ( $M+1$ , 100 %); HRMS (ESI): calcd for  $\text{C}_{15}\text{H}_{15}\text{N}_2\text{O}_3\text{S}$  ( $M+H$ ) $^+$  303.0803, found 303.0792.

**2-(3-Chloropropyl)-1-(phenylsulfonyl)-1H-pyrrolo[2,3-b]pyridine (3e)**: White solid, mp 150-152 °C;  $R_f$  (15% ethyl acetate / n-hexane), 0.3;  $^1\text{H}$  NMR ( $\text{CDCl}_3$ , 400 MHz)  $\delta$  8.35 (dd,  $J = 4.8, 2$

Hz, 1H), 8.10 (m, 2H), 7.70 (dd,  $J = 7.6, 1.6$ , 1H), 7.57-7.43 (m, 3H), 7.11 (m, 1H), 6.39 (s, 1H), 3.64 (t,  $J = 6.4$  Hz, 2H), 3.31 (t,  $J = 7.6$  Hz, 2H), 2.34-2.29 (m, 2H);  $^{13}\text{C}$  NMR ( $\text{CDCl}_3$ , 50 MHz)  $\delta$  26.7, 31.8, 44.1, 105.9, 119.1, 121.5, 127.6 (2C), 128.1, 128.9 (2C), 133.8, 139.0, 141.0, 143.9, 149.2; IR ( $\text{cm}^{-1}$ , KBr) 2955, 1398, 1370, 1160; Mass (ES)  $m/z$  335 ( $\text{M}+1$ , 100 %); HRMS (ESI):  
5 calcd for  $\text{C}_{16}\text{H}_{16}\text{ClN}_2\text{O}_2\text{S}$  ( $\text{M}+\text{H}$ ) $^+$  335.0621, found 335.0635.

**2-((2-Nitrophenoxy)methyl)-1-(phenylsulfonyl)-1H-pyrrolo[2,3-b]pyridine (3f)**: Yellow solid, mp 110-112 °C;  $R_f$  (30 % ethyl acetate / n-hexane), 0.3;  $^1\text{H}$  NMR ( $\text{CDCl}_3$ , 400 MHz)  $\delta$  8.41 (dd,  $J = 4.8, 1$  Hz, 1H), 8.19 (d,  $J = 7.6$  Hz, 2H), 7.92 (dd,  $J = 8.0, 1.2$  Hz, 1H), 7.82 (dd,  $J = 7.6, 1.2$  Hz, 1H), 7.63-7.47 (m, 4H), 7.29 (d,  $J = 8.8$ , 1H), 7.20-7.11 (m, 2H), 6.9 (s, 1H), 5.7 (s, 2H);  $^{13}\text{C}$   
10 NMR ( $\text{CDCl}_3$ , 50 MHz)  $\delta$  65.5, 107.7, 114.9, 119.4, 121.2, 121.3, 125.9, 128.0 (2C), 129.0(2C), 129.4(2C), 134.2(2C), 134.5, 135.1, 138.5, 145, 151.5; IR ( $\text{cm}^{-1}$ , KBr) 3134, 2925, 1629, 1607, 1525, 1383, 1270, 1138; Mass (ES)  $m/z$  410 ( $\text{M}+1$ , 100 %); HRMS (ESI): calcd for  $\text{C}_{20}\text{H}_{16}\text{N}_3\text{O}_5\text{S}$  ( $\text{M}+\text{H}$ ) $^+$  410.0811, found 410.0825.

**(S)-Methyl-2-phenyl-2-(4-(1-(phenylsulfonyl)-1H-pyrrolo[2,3-b]pyridin-2-yl)benzamido)acetate (3g)**: Yellow solid, mp 66-68 °C;  $R_f$  (40% ethyl acetate / n-hexane), 0.3;  $^1\text{H}$  NMR ( $\text{CDCl}_3$ , 400 MHz)  $\delta$  8.48 (dd,  $J = 5.2, 2$  Hz, 1H), 7.92-7.62 (m, 7H), 7.57-7.35 (m, 11H), 7.25-7.19 (m, 1H), 6.55 (s, 1H), 5.8 (d,  $J = 6.8$ , 1H), 3.8 (s, 3H);  $^{13}\text{C}$  NMR ( $\text{CDCl}_3$ , 50 MHz)  $\delta$  53.0, 57.0, 110.0, 120.0, 122.0, 126.6 (2C), 127.3 (2C), 127.6 (2C), 128.7 (2C), 128.8 (2C), 129.0 (2C), 130.0 (2C), 133.7, 133.9, 136.0, 136.4, 138.2, 140.9, 145.1, 150.2, 166.0, 171.4; IR ( $\text{cm}^{-1}$ , KBr) 3245, 3061, 2925, 1765, 1729, 1360, 1244, 1132; Mass (ES)  $m/z$  526 ( $\text{M}+1$ , 100 %); HRMS (ESI): calcd for  $\text{C}_{29}\text{H}_{24}\text{N}_3\text{O}_5\text{S}$  ( $\text{M}+\text{H}$ ) $^+$  526.1437, found 526.1440.  
20

**(S)-Methyl-3-methyl-2-(4-(1-(phenylsulfonyl)-1H-pyrrolo[2,3-b]pyridin-2-yl)benzamido)butanoate (3h)**: Low melting solid;  $R_f$  (45% ethyl acetate / n-hexane), 0.3;  $^1\text{H}$  NMR ( $\text{CDCl}_3$ , 400 MHz)  $\delta$  8.49 (dd,  $J = 5.2, 1.4$  Hz, 1H), 7.92-7.87 (m, 4H), 7.80 (dd,  $J = 8, 1.6$  Hz, 1H), 7.66-7.37 (m, 5H), 7.25-7.20 (m, 1H), 6.72 (d,  $J = 8.8$  Hz, 1H), 6.56 (s, 1H), 4.83-4.75 (m, 1H), 3.8 (s, 3H), 2.33-2.29 (m, 1H), 1.06-1.02 (m, 6H);  $^{13}\text{C}$  NMR ( $\text{CDCl}_3$ , 50 MHz)  $\delta$  17.9, 18.9, 31.5, 52.1, 57.5, 110.0, 119.0, 122.2, 126.4 (2C), 127.5 (2C), 128.6, 128.8, 129.0, 129.8 (2C), 133.7, 134.0, 135.8, 138.0, 140.8, 144.9, 150.0, 166.0, 172.0; IR ( $\text{cm}^{-1}$ , KBr) 3240, 3065, 2920, 1760, 1732, 1250, 1370, 1245, 1128; Mass (ES)  $m/z$  492 ( $\text{M}+1$ , 100 %); HRMS (ESI):  
25 calcd for  $\text{C}_{26}\text{H}_{26}\text{N}_3\text{O}_5\text{S}$  ( $\text{M}+\text{H}$ ) $^+$  492.1593, found 492.1600.

**2-(t-Butyl)-1-(phenylsulfonyl)-1H-pyrrolo[2,3-b]pyridine (3i)**: Yellow solid, mp 115-117 °C;  $R_f$  (10% ethyl acetate / n-hexane), 0.3;  $^1\text{H}$  NMR ( $\text{CDCl}_3$ , 400 MHz)  $\delta$  8.22 (dd,  $J = 4.8, 1.6$  Hz, 1H),

8.03-8.01 (m, 2H), 7.65 (dd,  $J = 7.6, 1.6$  Hz, 1H), 7.49-7.38 (m, 4H), 7.06-7.03 (m, 1H), 6.5 (s, 1H), 1.68 (s, 9H);  $^{13}\text{C}$  NMR ( $\text{CDCl}_3$ , 50 MHz)  $\delta$  29.7, 31.2 (2C), 34.9, 105.4, 118.8, 120.8, 127.9 (3C), 128.3 (2C), 133.1, 140.3, 143.5, 150.4, 153.3; IR ( $\text{cm}^{-1}$ , KBr) 2924, 1371, 1259, 1132; Mass (ES)  $m/z$  315 (M+1, 100 %); HRMS (ESI): calcd for  $\text{C}_{17}\text{H}_{19}\text{N}_2\text{O}_2$  S(M+H) $^+$  315.1177, found 315.1167.

**1-(Methylsulfonyl)-2-phenyl-1H-pyrrolo[2,3-b]pyridine (3j)**; Yellow solid, mp 140-142 °C;  $R_f$  (20% ethyl acetate / n-hexane), 0.3;  $^1\text{H}$  NMR ( $\text{CDCl}_3$ , 400 MHz)  $\delta$  8.48 (dd,  $J = 5.2, 2$  Hz, 1H), 7.90 (dd,  $J = 7.6, 1.2$  Hz, 1H), 7.54-7.42 (m, 4H), 7.30-7.27 (m, 2H), 6.55 (s, 1H), 3.56 (s, 3H);  $^{13}\text{C}$  NMR ( $\text{CDCl}_3$ , 50 MHz)  $\delta$  42.9, 107.9, 119.5, 122.1, 127.7 (2C), 128.8 (2C), 129.1, 129.6 (2C), 132.1, 141.8, 144.5; IR ( $\text{cm}^{-1}$ , KBr) 3060, 2924, 1387, 1370, 1180; Mass (ES)  $m/z$  273 (M+1, 100 %); HRMS (ESI): calcd for  $\text{C}_{14}\text{H}_{13}\text{N}_2\text{O}_2$  S(M+H) $^+$  273.0698, found 273.0682.

**2-Pentyl-1-(phenylsulfonyl)-1H-pyrrolo[2,3-b]pyridine (3k)**; Yellow solid, mp 120-124 °C;  $R_f$  (10% ethyl acetate / n-hexane), 0.3;  $^1\text{H}$  NMR ( $\text{CDCl}_3$ , 400 MHz)  $\delta$  8.33 (d,  $J = 5.2$  Hz, 1H), 8.10 (d,  $J = 8$  Hz, 2H), 7.68 (d,  $J = 7.6$  Hz, 1H), 7.55-7.42 (m, 3H), 7.12-7.09 (m, 1H), 6.32 (s, 1H), 3.15 (t,  $J = 7.6$  Hz, 2H), 1.84-1.77 (m, 2H), 1.46-1.25 (m, 4H), 0.92 (t,  $J = 7.2$  Hz, 3H);  $^{13}\text{C}$  NMR ( $\text{CDCl}_3$ , 50 MHz)  $\delta$  14.0, 22.5, 28.5, 29.3, 31.5, 104.7, 119.0, 121.8, 127.5 (2C), 127.8, 128.9 (2C), 133.6, 139.4, 143.5, 143.6, 149.3; IR ( $\text{cm}^{-1}$ , KBr)  $\text{cm}^{-1}$  2936, 2857, 1397, 1378, 1254, 1155; Mass (ES)  $m/z$  329 (M+1, 100 %); HRMS (ESI): calcd for  $\text{C}_{18}\text{H}_{21}\text{N}_2\text{O}_2\text{S}$  (M+H) $^+$  329.1324, found 329.1340.

**4-(1-(Phenylsulfonyl)-1H-pyrrolo[2,3-b]pyridin-2-yl)butanenitrile (3l)**; Yellow solid, mp 147-150 °C;  $R_f$  (30% ethyl acetate / n-hexane), 0.3;  $^1\text{H}$  NMR ( $\text{CDCl}_3$ , 400 MHz)  $\delta$  8.37 (dd,  $J = 4.8, 1.6$  Hz, 1H), 8.09 (d,  $J = 7.2$  Hz, 2H), 7.72 (dd,  $J = 8, 1.6$  Hz, 1H), 7.57-7.49 (m, 5H), 7.16-7.13 (m, 1H), 6.42 (s, 1H), 3.3 (t,  $J = 7.2$  Hz, 2H), 2.50-2.46 (m, 2H), 2.2 (t,  $J = 7.2$  Hz, 2H);  $^{13}\text{C}$  NMR ( $\text{CDCl}_3$ , 50 MHz)  $\delta$  16.5, 24.9, 28.3, 106.3, 119.1, 119.2, 121.4, 127.6 (2C), 128.3(2C), 128.5 (2C), 128.9 (2C), 133.9, 138.8, 140.0, 144.2, 149.2; IR ( $\text{cm}^{-1}$ , KBr) 2925, 2230, 1399, 1363, 1258, 1184; Mass (ES)  $m/z$  326 (M+1, 100 %); HRMS (ESI): calcd for  $\text{C}_{17}\text{H}_{16}\text{N}_3\text{O}_2$  S (M+H) $^+$  326.0963, found 326.0986.

**1-(Phenylsulfonyl)-1H-pyrrolo[2,3-b]pyridine-2-carbaldehyde (6)**: To a solution of the **3b** (1.35 g, 4.6 mmol) in anhydrous chloroform was added active  $\text{MnO}_2$  (6.1 g, 70.3 mmol). The mixture was stirred at room temperature for 6 h under  $\text{N}_2$ . After completion, the reaction mixture was cooled to room temperature, diluted with  $\text{CHCl}_3$  (20 mL) and filtered through a celite bed. The filtrate was concentrated to afford 1.14 g (85% yield) of desired product; white solid, mp 140-145

$^{\circ}\text{C}$ ;  $R_f$  (30% ethyl acetate / n-hexane), 0.3;  $^1\text{H}$  NMR ( $\text{CDCl}_3$ , 400 MHz)  $\delta$  10.6 (s, 1H), 8.61 (d,  $J = 4.0$  Hz, 1H), 8.16 (d,  $J = 8.0$  Hz, 2H), 7.97 (d,  $J = 7.6$  Hz, 1H), 7.61-7.57 (m, 1H), 7.51-7.47 (m, 2H), 7.40 (s, 1H), 7.29-7.25 (m, 1H);  $^{13}\text{C}$  NMR ( $\text{CDCl}_3$ , 50 MHz)  $\delta$  114.0, 120.2, 128.0 (2C), 128.7, 129.1, 129.4, 132.0, 134.0, 134.4, 137.4, 137.9, 148.9, 183.2; IR ( $\text{cm}^{-1}$ , KBr)  $\text{cm}^{-1}$  2932, 1682, 1373, 1265, 1176; Mass (ES)  $m/z$  287 ( $\text{M}+1$ , 100 %); HRMS (ESI): calcd for  $\text{C}_{14}\text{H}_{11}\text{N}_2\text{O}_3\text{S}$  ( $\text{M}+\text{H}$ ) $^+$  287.0490, found 287.1034.

## Biology

### A yeast cell based assay<sup>3</sup> for identification of potential inhibitors of HDAC Sir2

**Reporter silencing assay:** In this assay a yeast strain (TEL::URA3 strain (MAT $\alpha$  ura3-52 lys2-801 ade2-101 trp $\Delta$ 63 his3 $\Delta$ 200 leu3 $\Delta$ 200 leu2- $\Delta$ 1 TEL adh4::URA) was used in which, a reporter gene URA3 was inserted in the silenced telomeric region where it is silenced by yeast Sir2 protein. A compound having the Sir2 protein inhibitory effect will inhibit the Sir2 protein, and thus the URA3 gene will be expressed and this will result in the death of the yeast cell in presence of 5-fluoro orotic acid (5-FOA) through formation of toxic 5-fluorouracil. This assay can also test the toxicity of compounds. The cells when grown in absence of 5-FOA should grow if the compound is not toxic. However in case of a toxic compound yeast cells would die.

The yeast strain was inoculated in 5.0 mL of YPDA media. The cells growing at the exponential phase were dispensed in the round bottom 96-well plate using cell dispenser. A Stock concentration of 10% 5-FOA was used to make a final concentration of 0.3% 5-FOA in the wells of 96-well plate. The compounds at a concentration of 50  $\mu\text{M}$  were added to each well and the plates were incubated at 30  $^{\circ}\text{C}$ . Absorbance at 590 was measured using 96 well plate reader after 24 and 48 h. The inhibitory effect of compounds was analyzed after plotting the OD vs concentration of the compound in Excel data sheet. Splitomicin was used as a control (data not shown).

### Docking studies

The Docking studies of azaindole derivatives were carried out on the Yeast Sir2 protein (PDB ID : 2HJH) with the help of the Schrodinger software.<sup>4</sup> Thus, the energy minimization and conformational search was performed with the MACROMODEL application in the Schrodinger package. The azaindole molecules were energy minimized for flexibility and conformational search was performed. We used OPLS\_2005 force field and water as implicit solvent. We have followed the PRCG (Polak-Ribier conjugate gradient) method of minimization with 500 iterations

with a threshold gradient on 0.05 kJ/mol. The conformational search was performed based on Montecarlo multiple minimum torsional sampling. The docking studies were done by creating the GLIDE GRID in the protein and ligand docking was carried out using the azaindole molecules.

**Procedure for molecular docking:** The 2HJH (yeast Sir2) protein crystal structure was obtained from protein data bank (PDB) and it was further refined with the protein preparation wizard application in which the hydrogens were added and the missing loops and amino acid residues were arranged through PRIME application. The water molecules beyond the 5 Å distance from the protein were removed. Finally the protein was optimized and then minimized with IMPREF application using the OPLS\_2005 force field. GLIDE GRID was created and ligand docking was done with the molecules previously prepared through the LIGPREP application of the software. Flexible type of docking was done and the glide score was calculated with the simple glide docking with XP mode application in the MASTERO 9.1 Interface.

## References

1. I. Louzao, J. M. Seco, E. Quinoa and R. Riguera, *Angew. Chem. Int. Ed.* 2010, **49**, 1430.
2. C. Hamdouchi, C. Sanchez and J. Ezquerra, *Synthesis* **1998**, 867.
3. C. M. Grozinger, E. D. Chao, H. E. Blackwell, D. Moazed, and S. L. Schreiber, *J. Biol. Chem.* 2001 **276**, 38837.
4. H. Maruoka, M. O. Barrett, H. Ko, D. K. Tosh, A. Melman, L. E. Burianek, R. Balasubramanian, B. Berk, S. Costanzi, T. K. Harden, K. A. Jacobson, *J. Med. Chem.* 2010, **53**, 4488.



## Copies of spectra

### **Alkynylation of *N*-(3-iodopyridin-2-yl)sulfonamide under Pd/C-Cu catalysis: A direct one pot synthesis of 7-azaindoles and their pharmacological evaluation as potential inhibitors of sirtuins**

Mohosin Layek,<sup>a,b</sup> Syam Kumar Y.,<sup>a</sup> Aminul Islam,<sup>a</sup> Ravikumar Karavarapu,<sup>c</sup> Amrita  
Sengupta,<sup>c</sup> Devyani Halder,<sup>c</sup> K. Mukkanti,<sup>b</sup> Manojit Pal<sup>c,\*</sup>

<sup>a</sup>*Dr. Reddy's Laboratories Ltd, Bollaram Road, Miyapur, Hyderabad 500049;  
India.*

<sup>b</sup>*Chemistry Division, Institute of Science and Technology, JNT University,  
Kukatpally, Hyderabad 500072;*

<sup>c</sup>*Institute of Life Sciences, University of Hyderabad Campus, Gachibowli,  
Hyderabad 500 046, Andhra Pradesh, India*

A473-MML-029 in CDCl<sub>3</sub>  
TDC-210

AR.No:MS0610/133  
Analyst:Srikanth.A  
Date:2nd June 2010

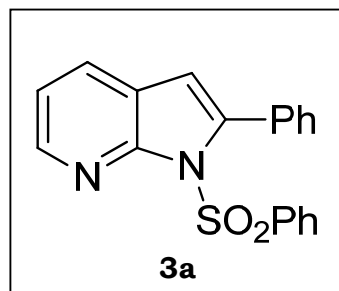

Instrument : Mercury Plus (Varian 400MHz)  
Date & Time : Wed Jun 2 13:53:07 IST 2010  
Recorded By : Srikanth.A

*Handwritten signature and date:*  
2/6/10

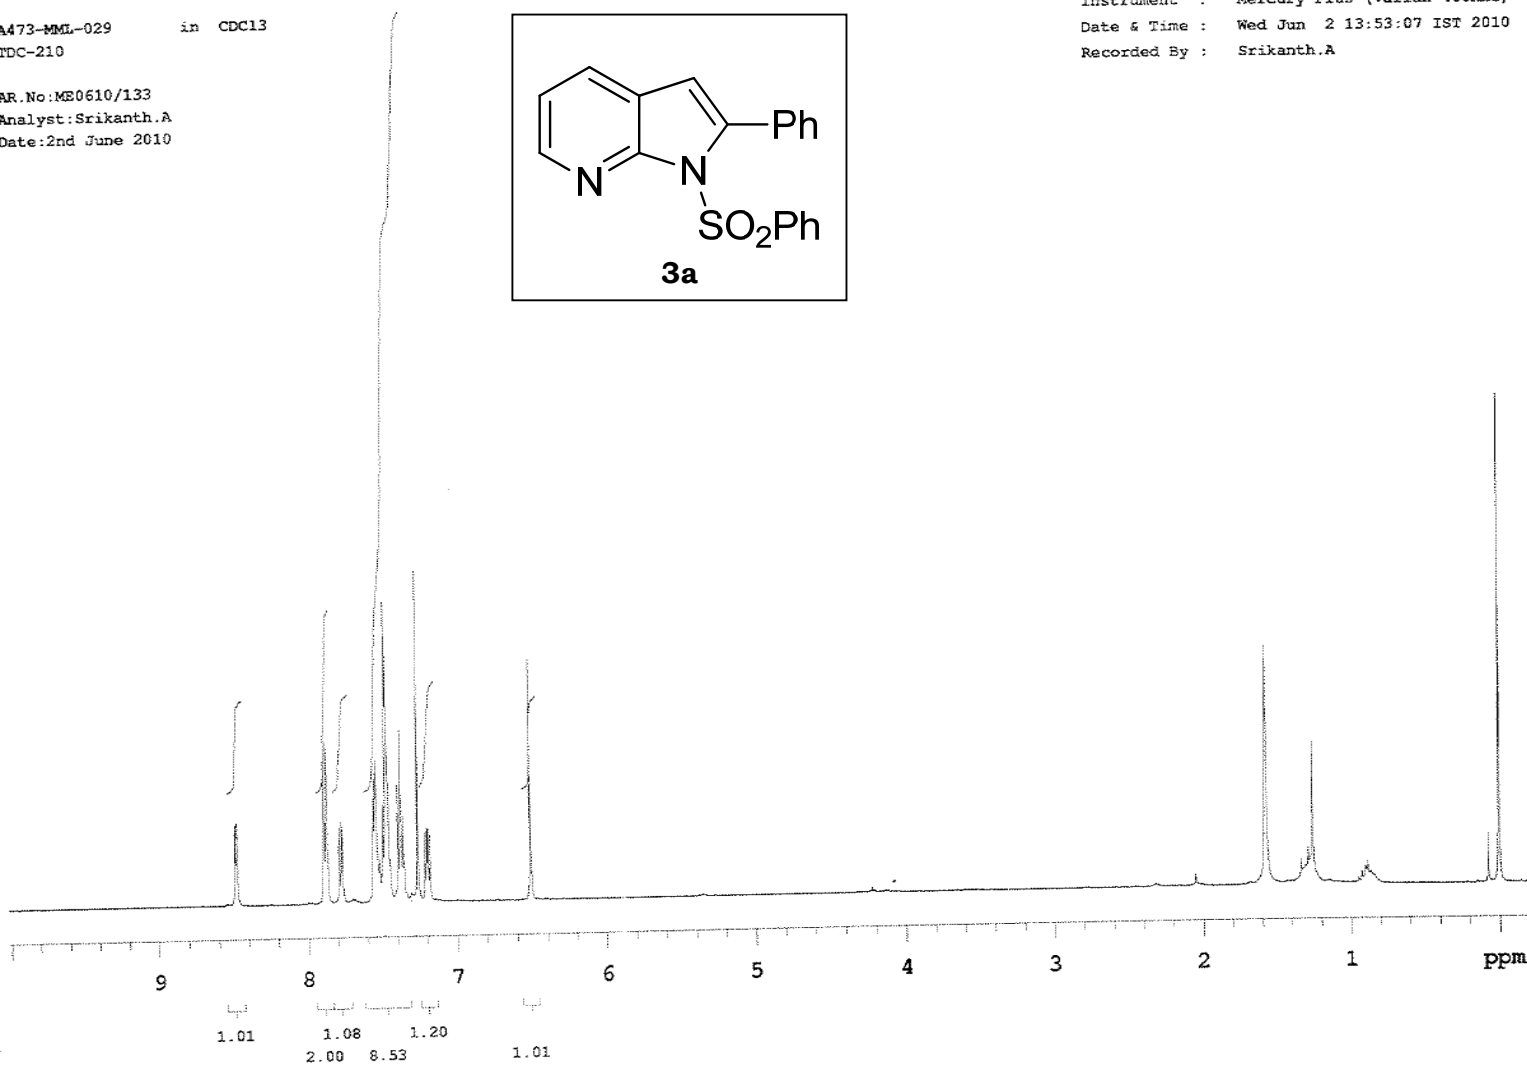

A473/CMOH/029 1n CUC13  
TDC-210

AR. NO:GE0610/19  
Analyst: Srikanth.A  
Date:10th June 2010

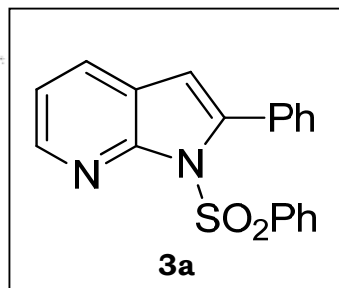

Instrument : Gemini 2000 (Varian 200MHZ)  
Date & Time : Thu Jun 10 13:57:58 GMT 2010  
Recorded By : Srikanth.A

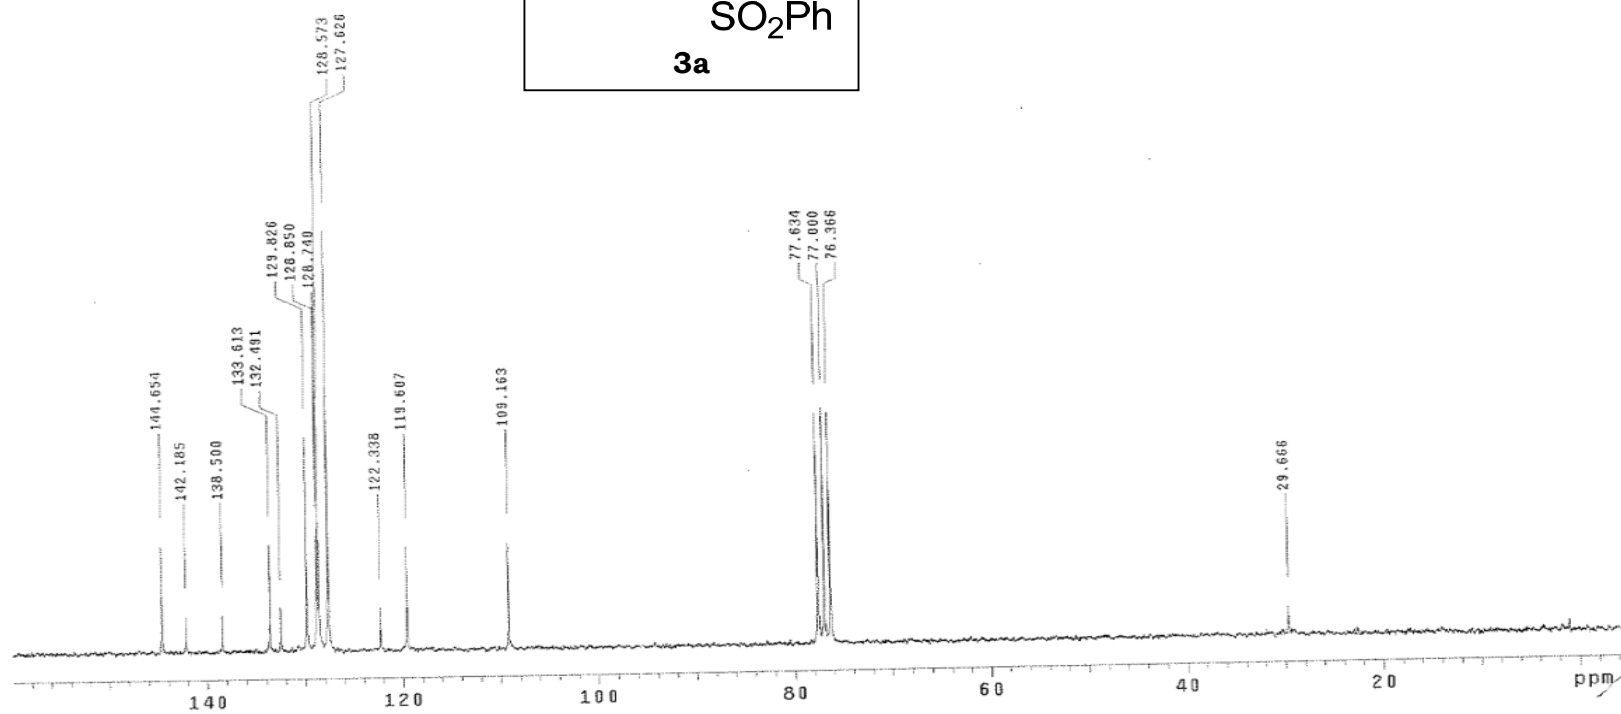

A472-MML-036 in CDCl<sub>3</sub>  
TDC-210

AR.No:ME0610/943  
Analyst:HARIBABU.R  
Date:14th June 2010

Instrument : Mercury Plus (Varian 400MHz)  
Date & Time : Mon Jun 14 16:08:45 IST 2010  
Srikanth.A

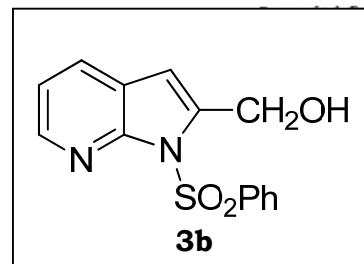

*Handwritten signature*

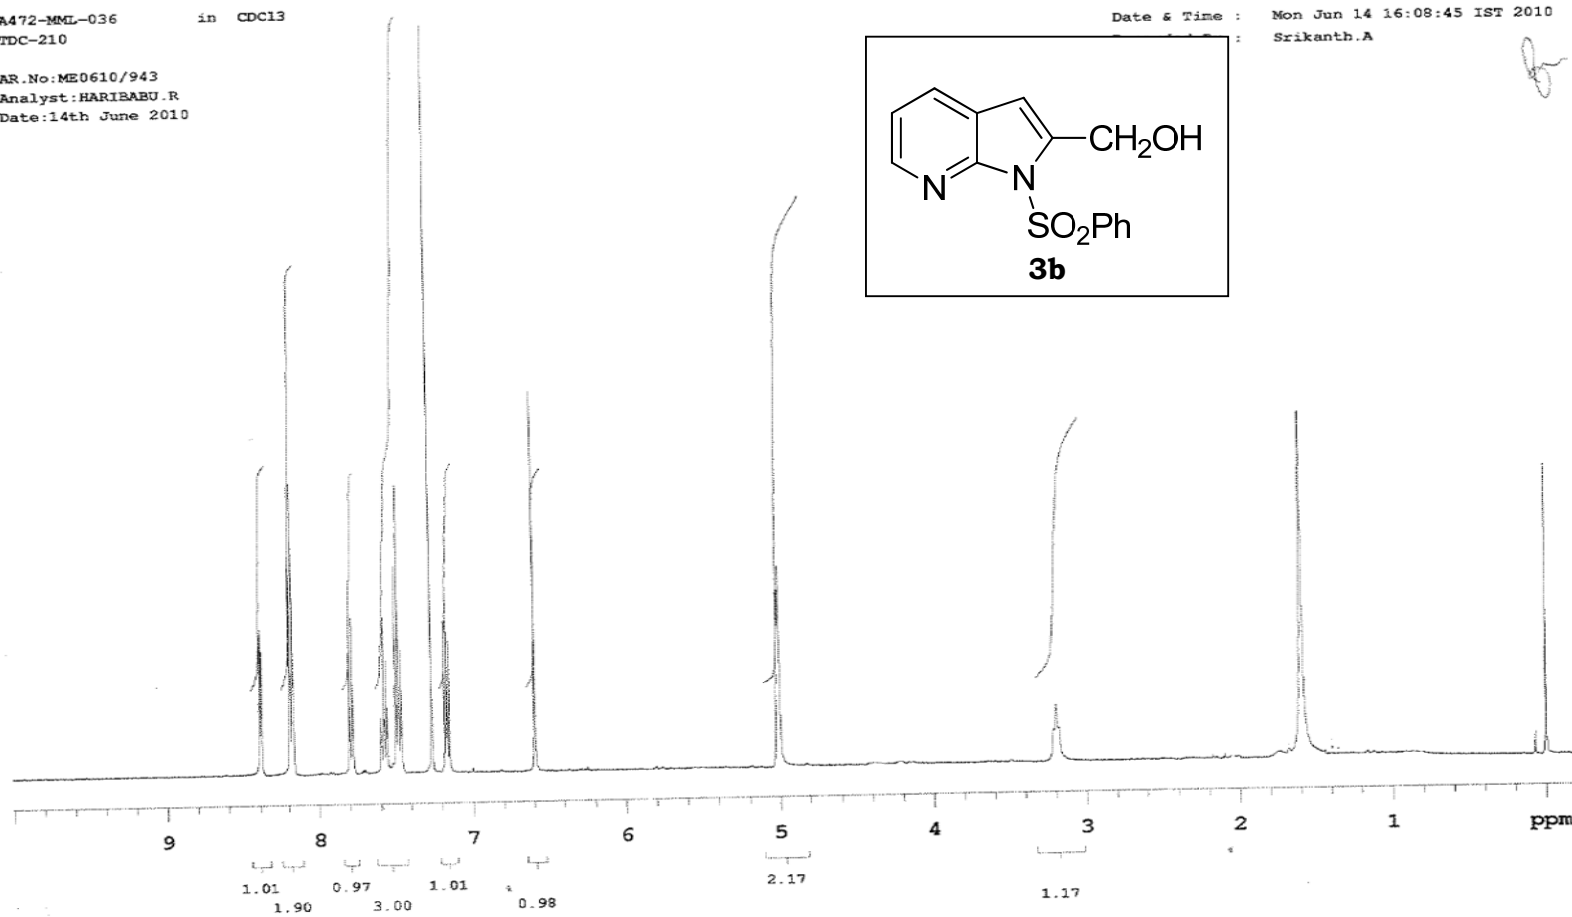

A472-MML/936 in CDC13  
TDC-210

AR NO:GE0810/75  
Analyst:Haribabu.R  
Date: 30 th Aug.2010

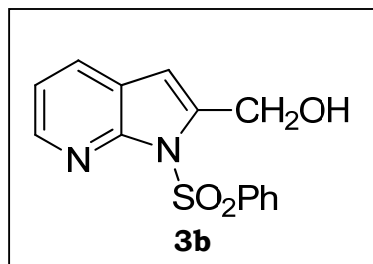

AR&D, Aurigene Discovery Technologies Ltd, Hydera  
Instrument : Gemini 2000 (Varian 200MHz)  
Date & Time : Tue Aug 31 14:47:18 GMT 2010  
Recorded By : Haribabu.R

96  
71

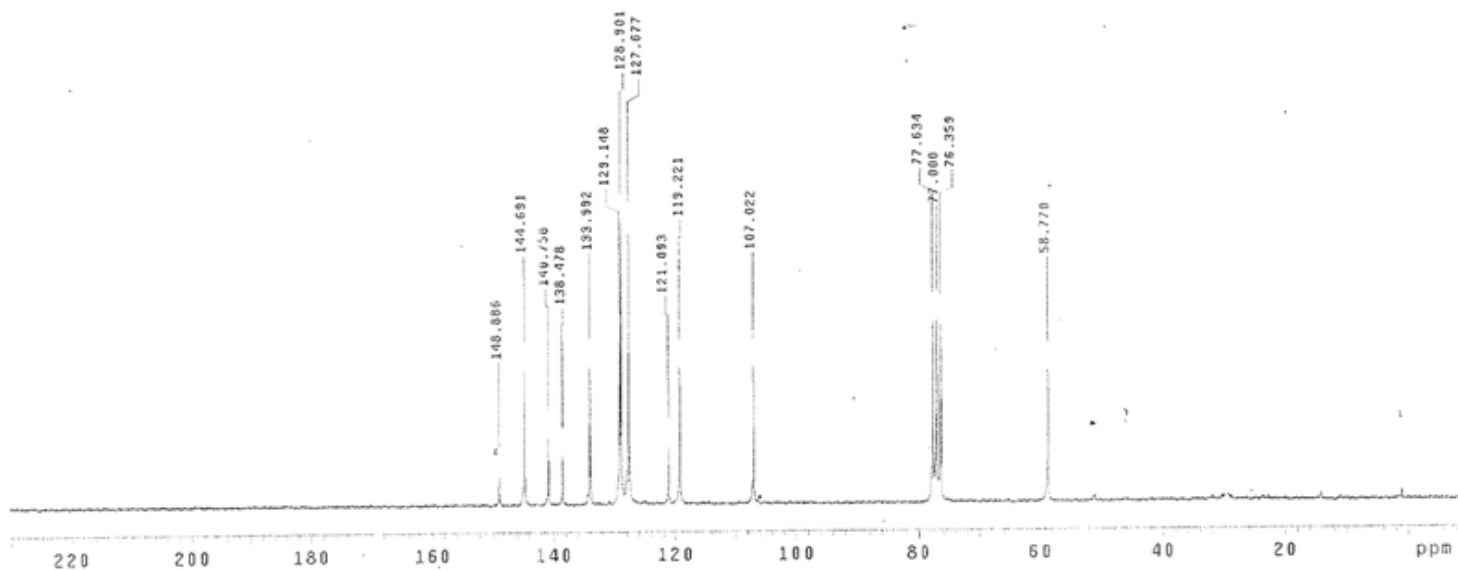

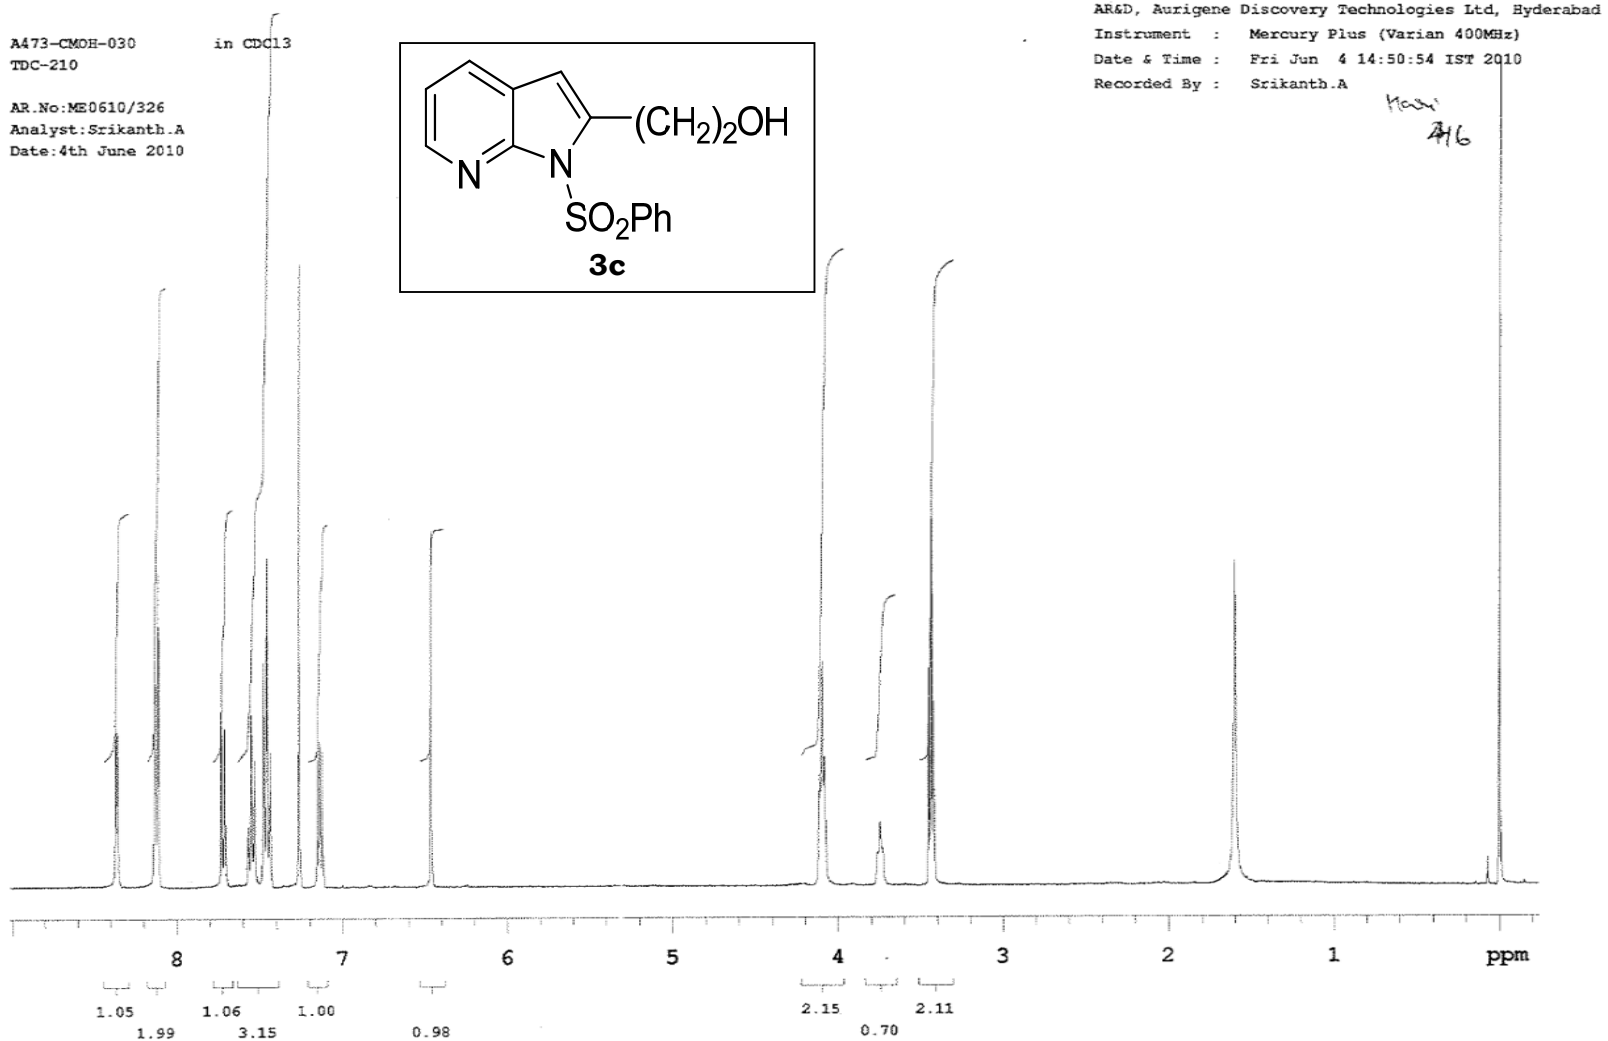

A473/CMOH/030 in CDC13  
TDC-210

AR.NO:GE0610/18  
Analyst: Srikanth.A  
Date:10th June 2010

317-127-110  
120/110  
Srikanth.A

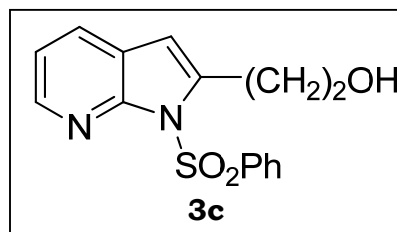

AR&D, Aurigene Discovery Technologies Ltd, Hyderabad  
Instrument : Gemini 2000 (Varian 200MHz)  
Date & Time : Thu Jun 10 10:45:59 GMT. 2010  
Recorded By : Srikanth.A

*[Handwritten signature]*  
10/6/10

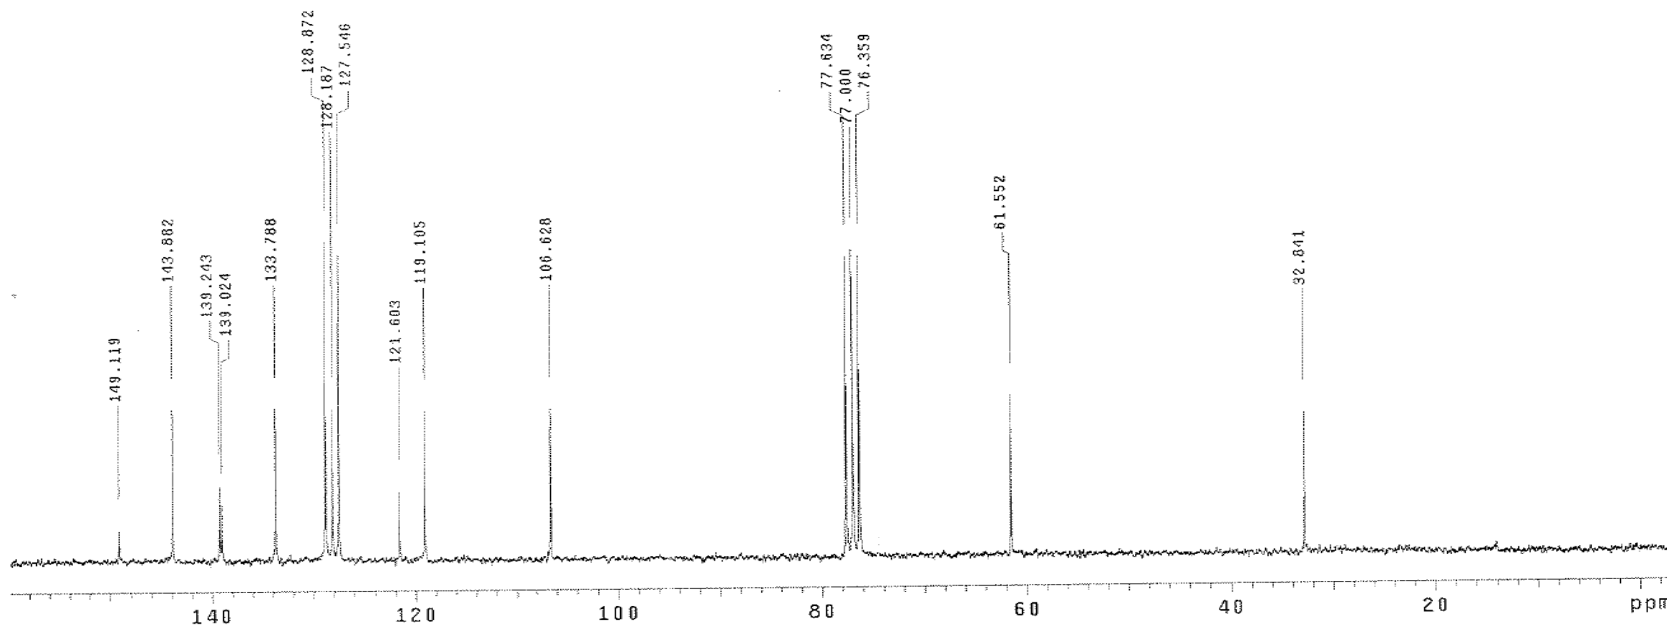

A472-MML-035 in CDCl<sub>3</sub>  
TDC-210

AR.No:ME0610/944  
Analyst:HARIBABU.R  
Date:14th June 2010

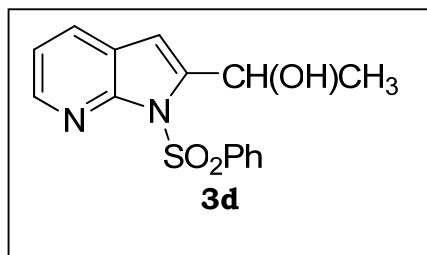

AR&D, Aurigene Discovery Technologies Ltd, Hyderabad  
Instrument : Mercury Plus (Varian 400MHz)  
Date & Time : Mon Jun 14 16:11:41 IST 2010  
Recorded By : Srikanth.A

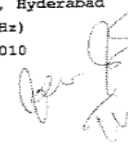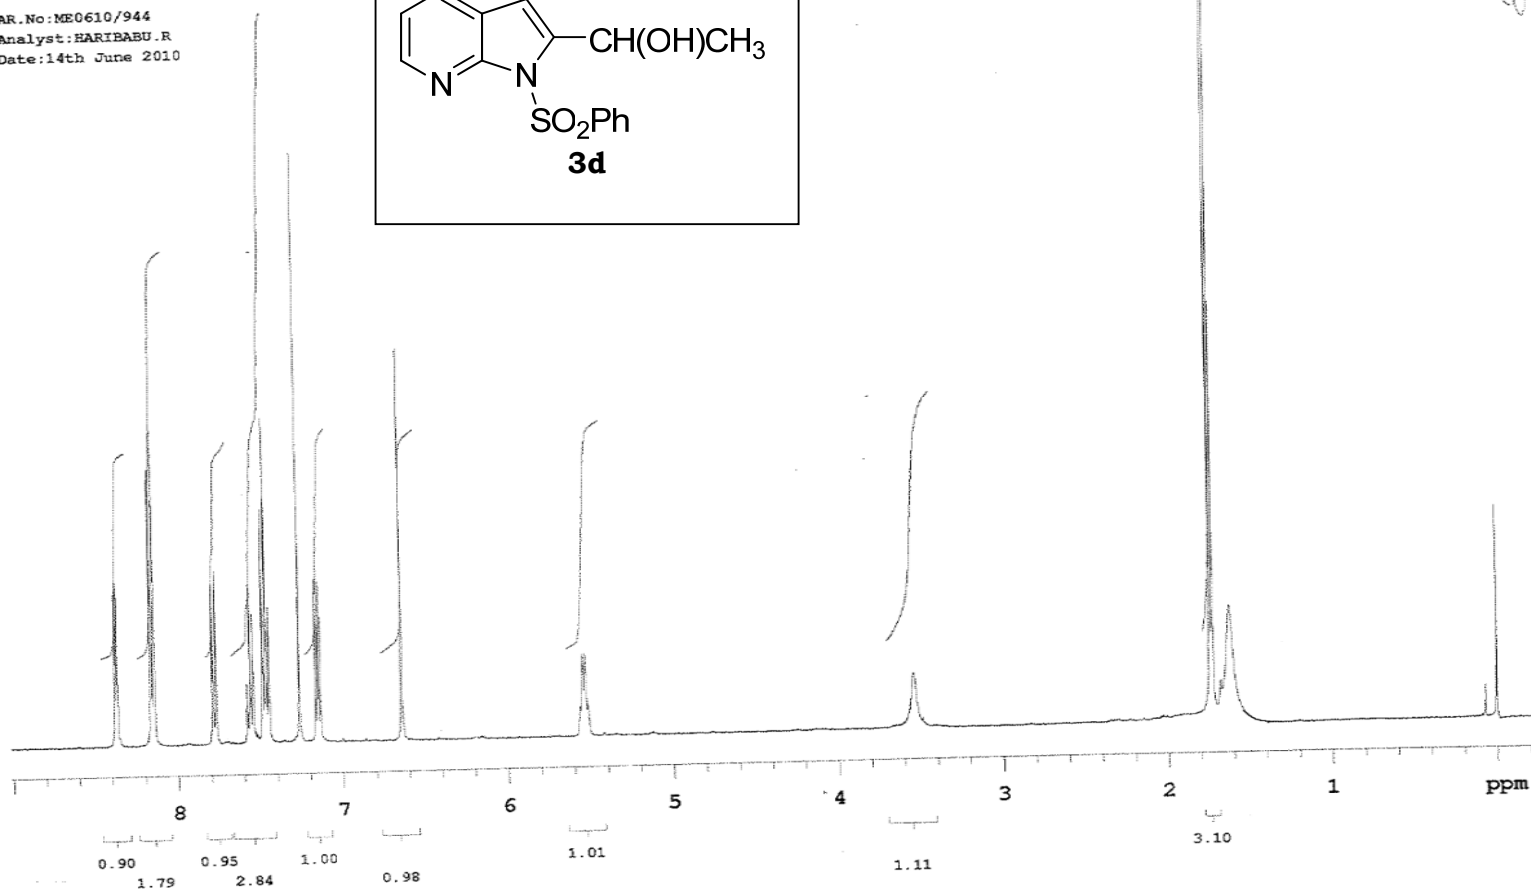



A473-MML-035 in CDC13  
TDC-210

AR.No:ME0610/1664  
Analyst:Haribabu.R  
Date:22nd June 2010

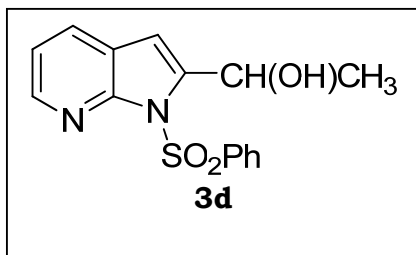

AR&D, Aurigene Discovery Technologies Ltd, Hyderabad  
Instrument : Mercury Plus (Varian 400MHz)  
Date & Time : Wed Jun 23 08:23:20 IST 2010  
Recorded By : Haribabu.R

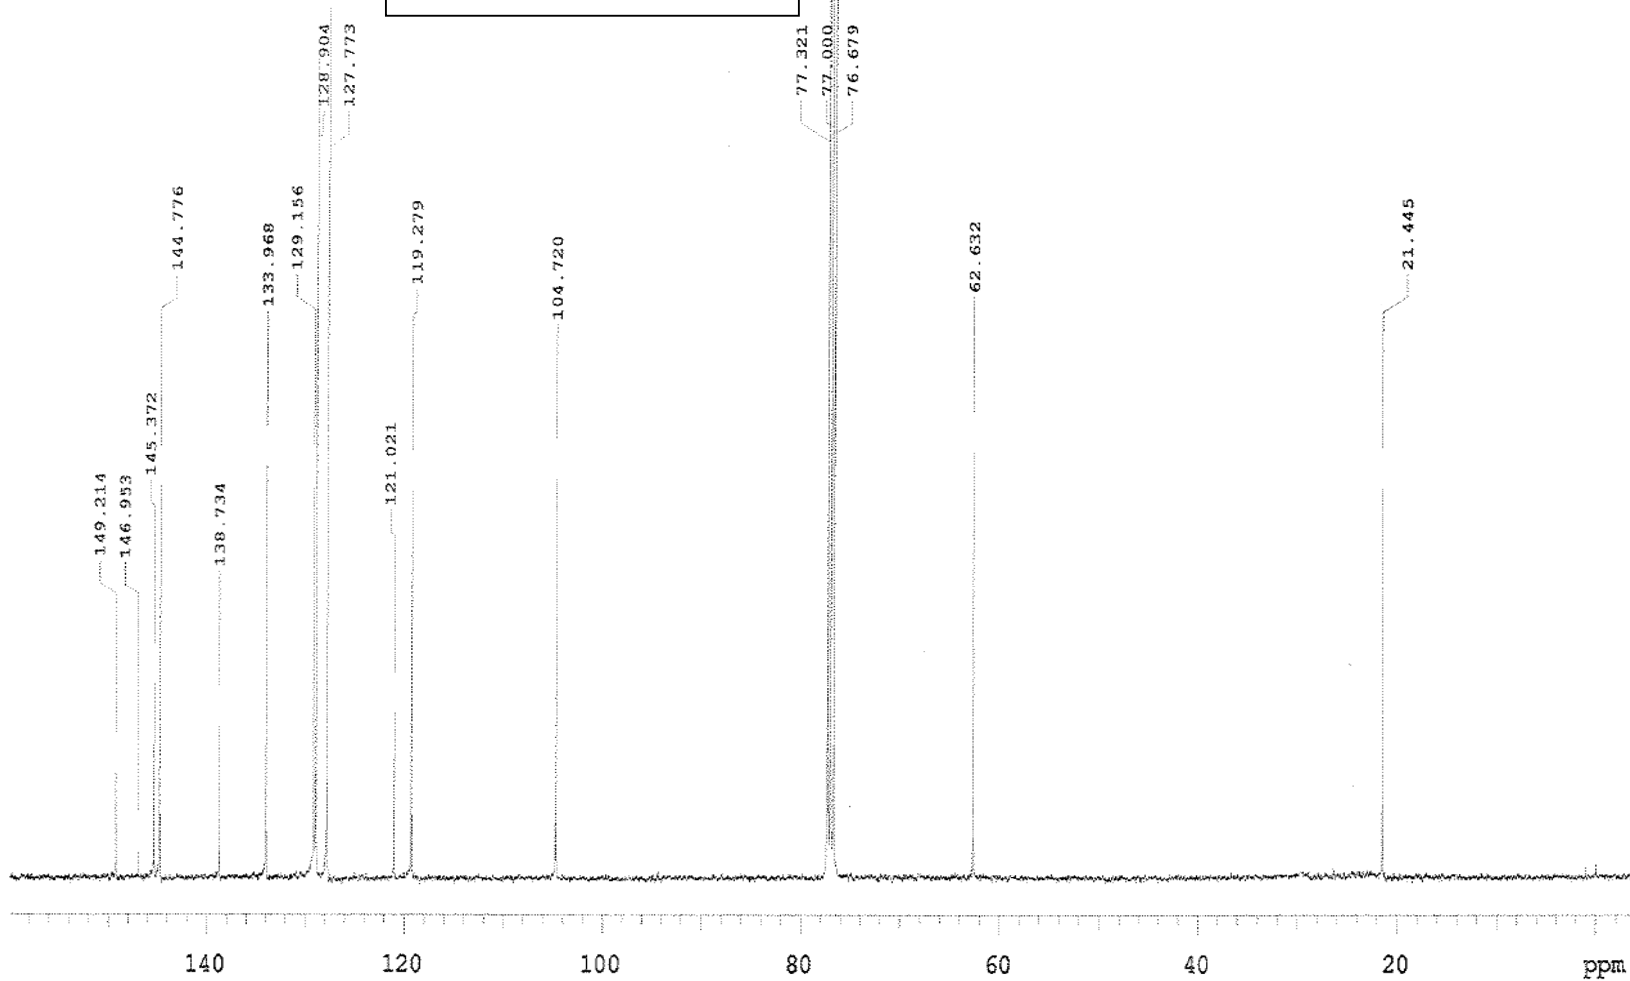

A472-MML-032 in CDCl<sub>3</sub>  
TDC-210

AR.No:ME0610/947  
Analyst:HARIBABU.R  
Date:14th June 2010

Instrument : Mercury Plus (Varian 400MHz)  
Date & Time : Mon Jun 14 16:22:54 IST 2010  
Recorded By : Srikanth.A

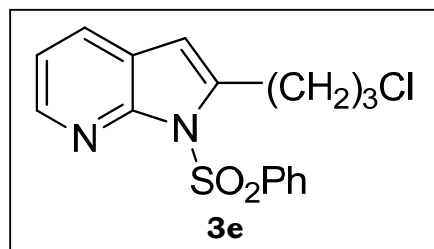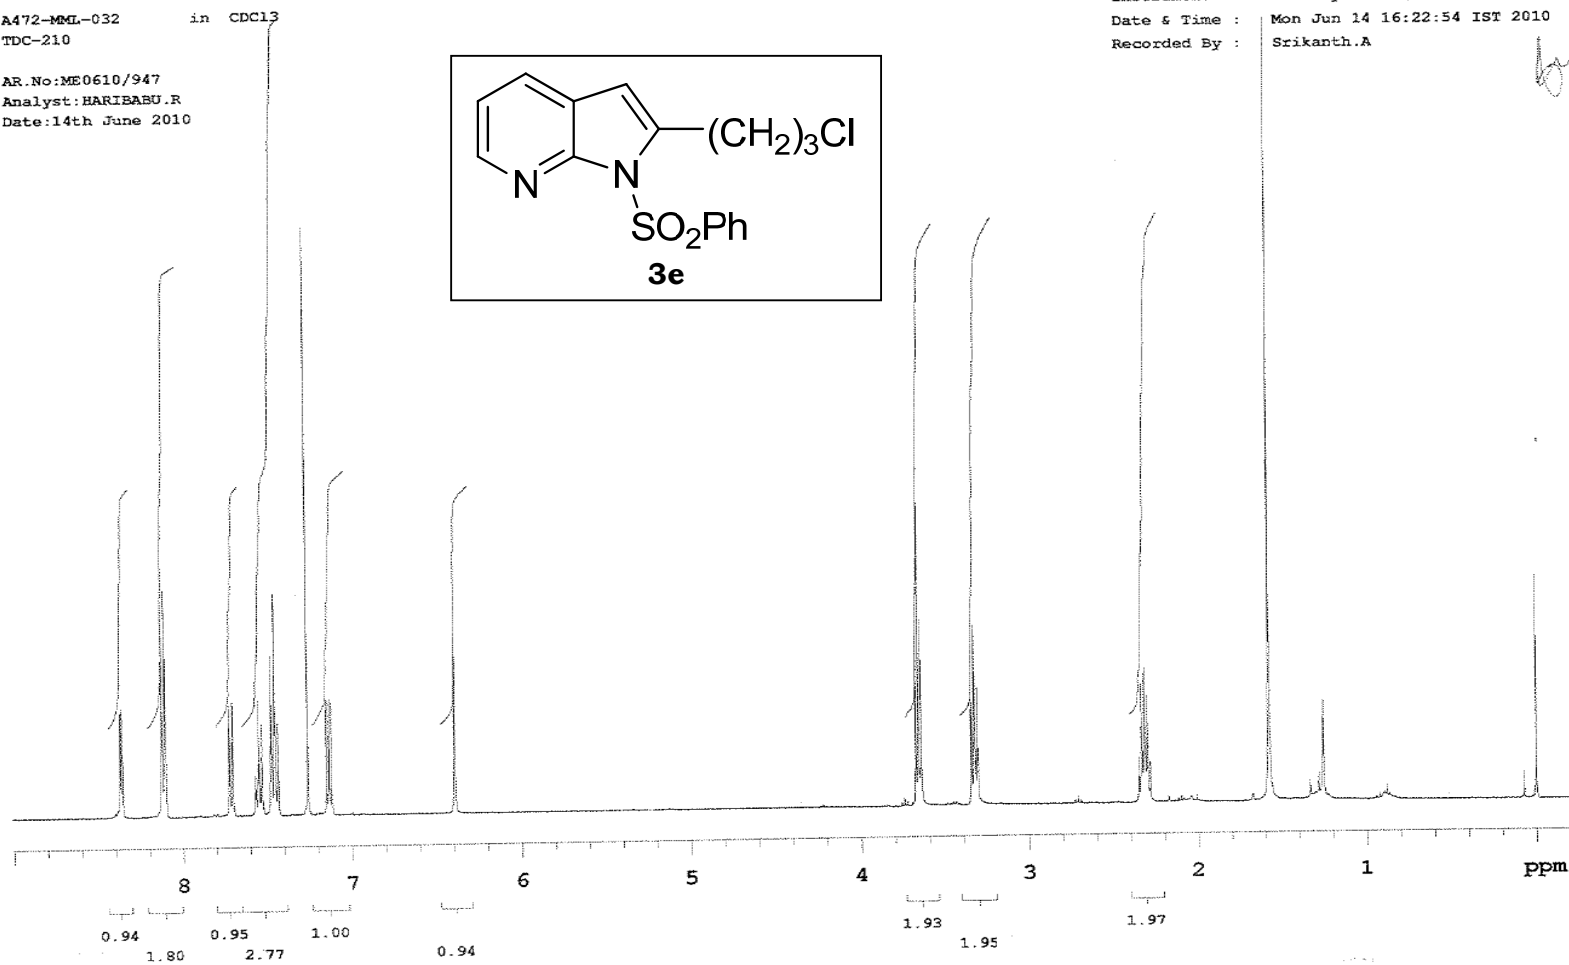

4473/MML/032 in CDC13  
TDC-210

AR.NO:GE0610/46  
Analyst:Srikanth.A  
Date:21st June 2010

Instrument : Gemini 2000 (Varian 200MHZ)  
Date & Time : Tue Jun 22 08:34:03 GMT 2010  
Recorded By : Srikanth.A

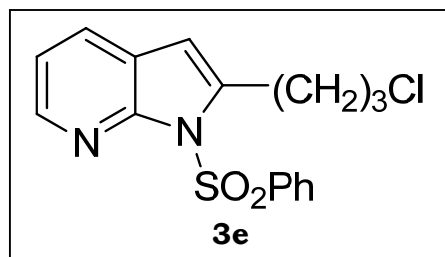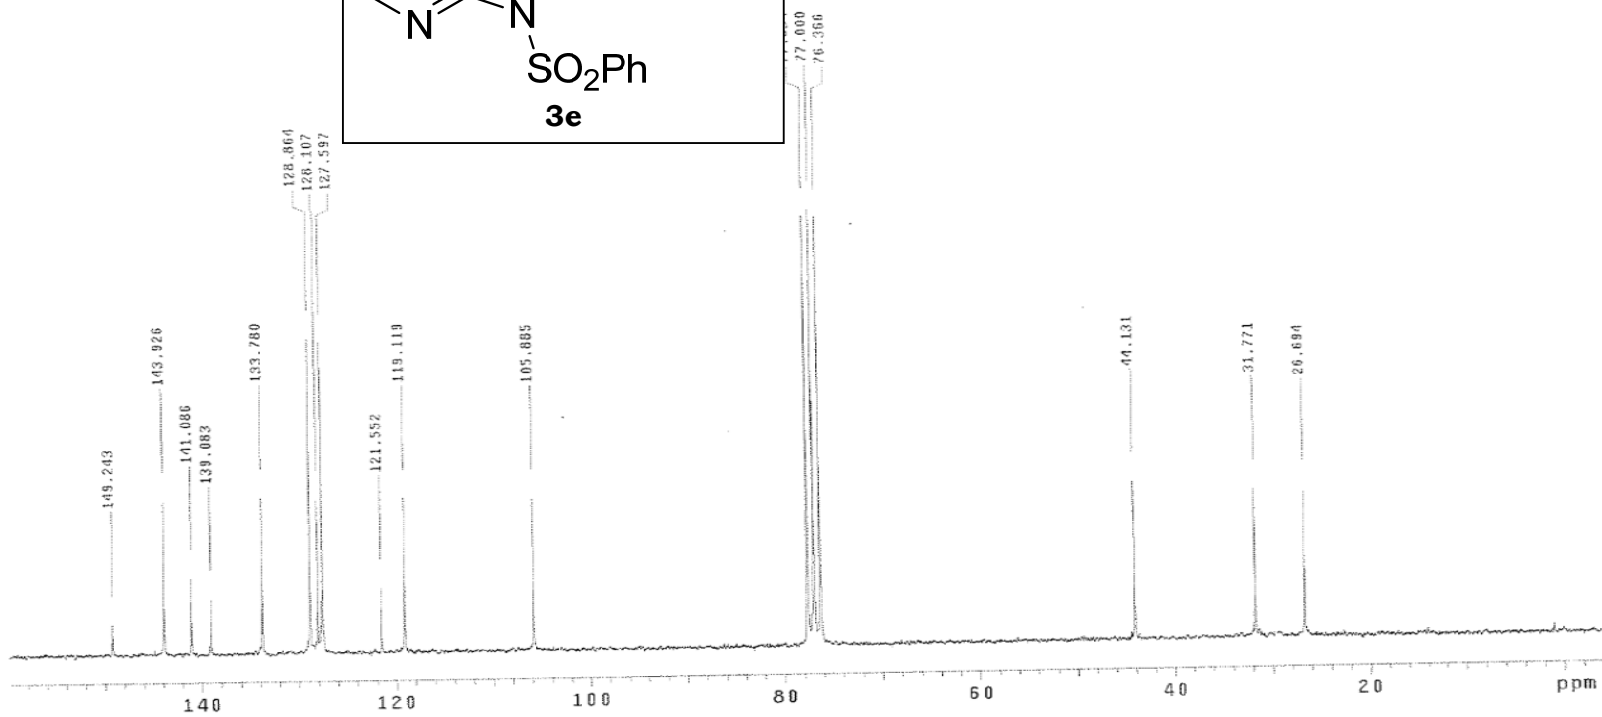

TQC-210-A472-MML-053Fr1 CDC13

AR.No:ME0810/98  
Analyst:Haribabu.R  
Date:2nd Aug. 2010.

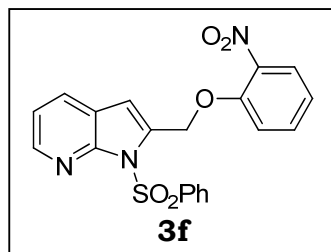

AR&D, Aurigene Discovery Technologies Ltd, Hyderabad  
Instrument : Mercury Plus (Varian 400MHz)  
Date & Time : Mon Aug 2 20:18:46 IST 2010  
Recorded By : Haribabu.R

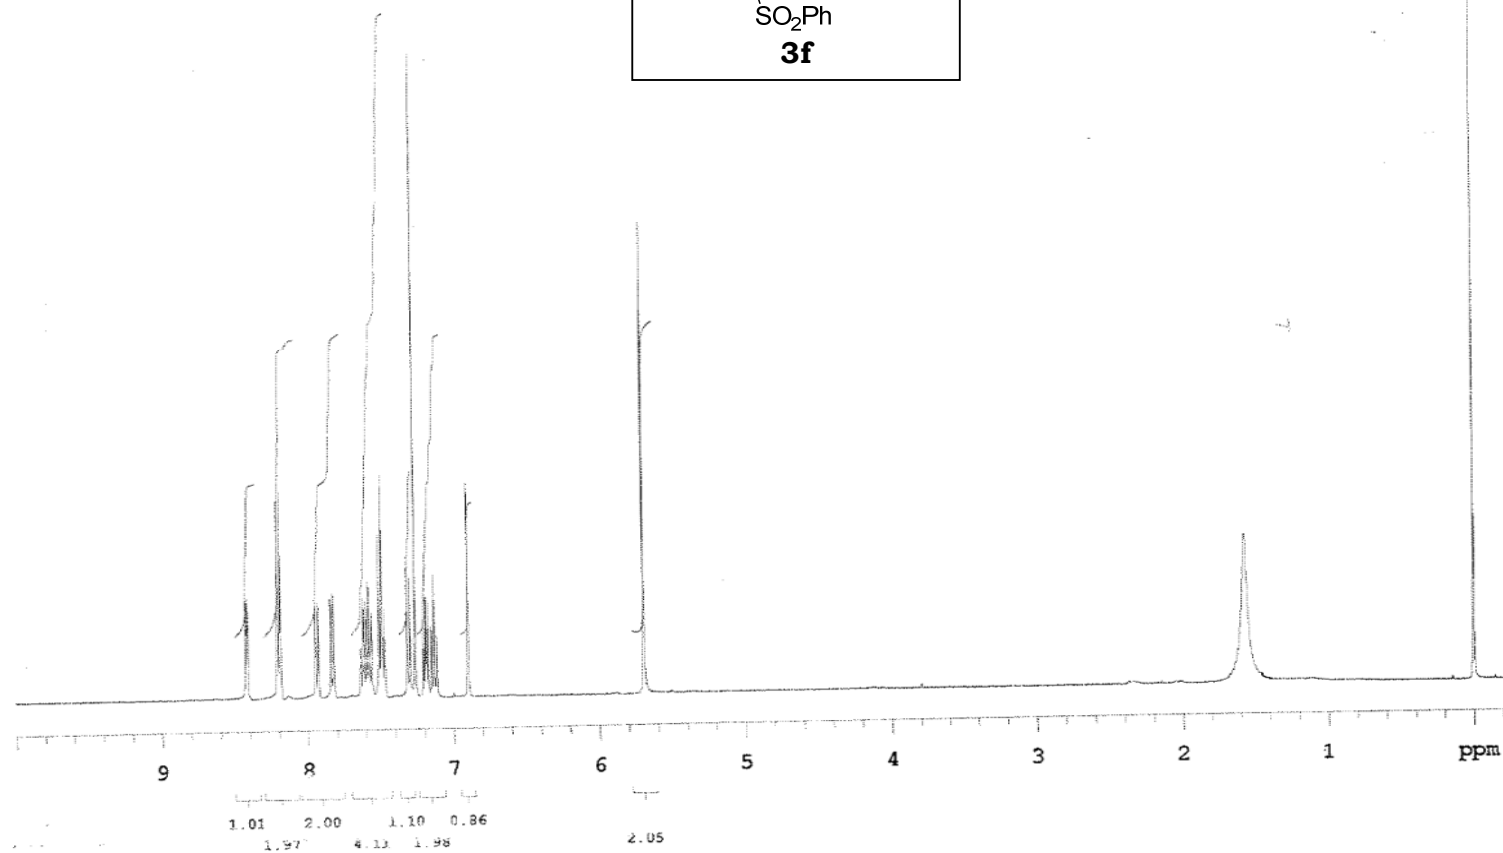

TDC-210-A472-MXL-053 in CDCl<sub>3</sub>

AR.No:ME0810/491  
Analyst:Haribabu.R  
Date:5th Aug 2010.

AR&D, Auxigene Discovery Technologies Ltd, Hyderabad  
Instrument : Mercury Plus (Varian 400MHz)  
Date & Time : Fri Aug 6 10:00:54 IST 2010  
Recorded By : Haribabu.R

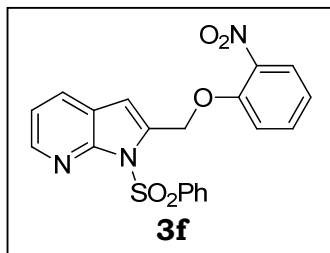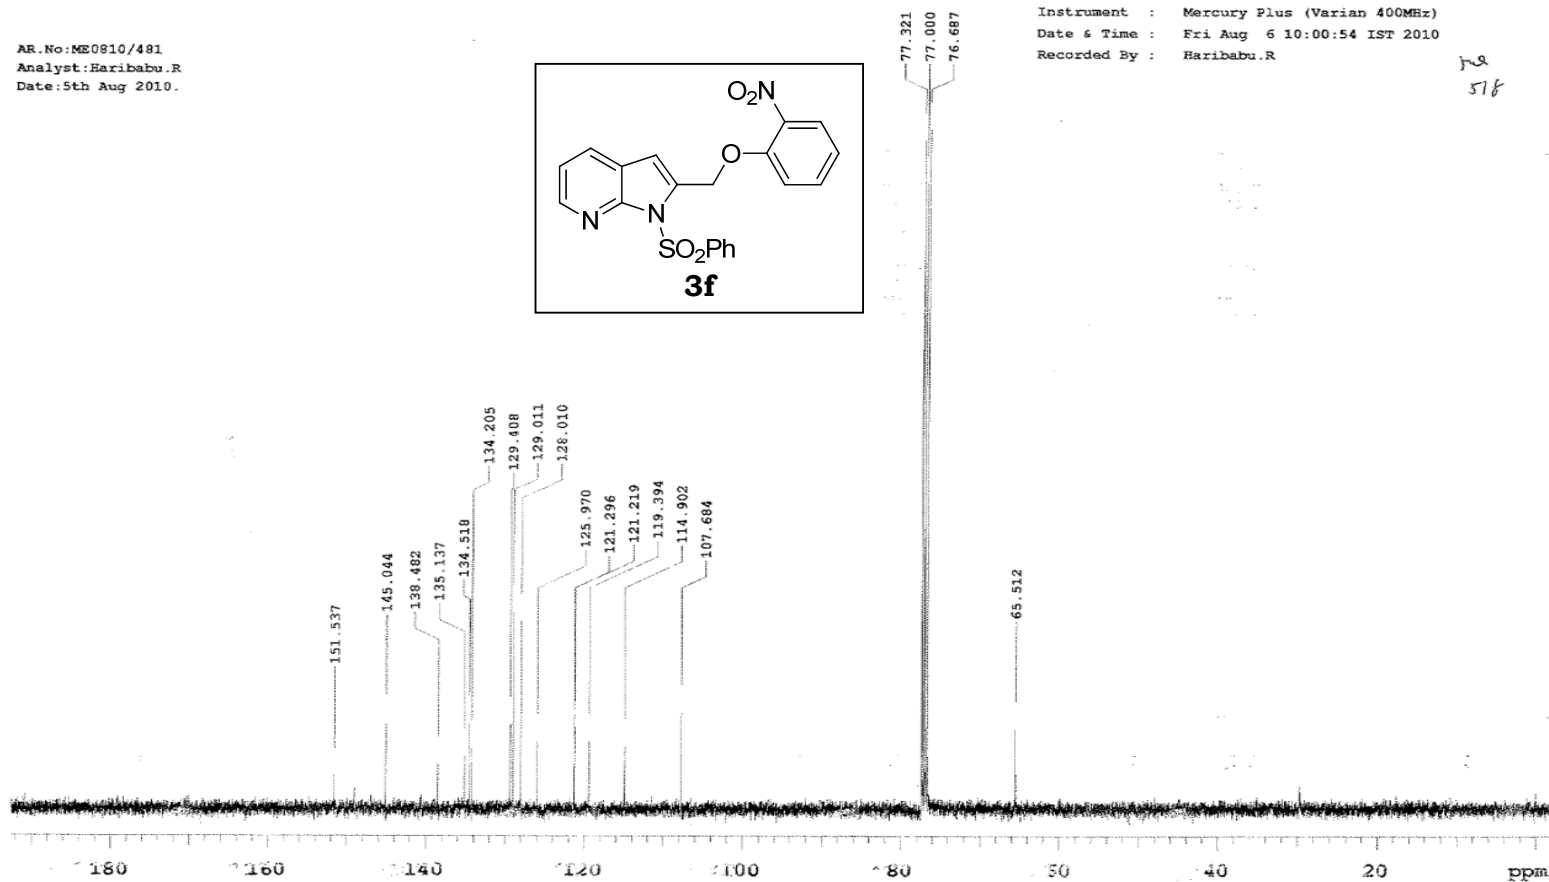

7a  
518

CPS.MIYAPUR

### Mass Analysis Report

|                 |              |                        |              |
|-----------------|--------------|------------------------|--------------|
| Data Filename   | 100806029.d  | Sample Name            | A472/MML/053 |
| Sample Type     | Sample       | Position               | Vial 42      |
| Instrument Name | Instrument 1 | User Name              |              |
| Acq Method      | ESI.m        | IRM Calibration Status | Success      |
| DA Method       | default.m    | Comment                |              |

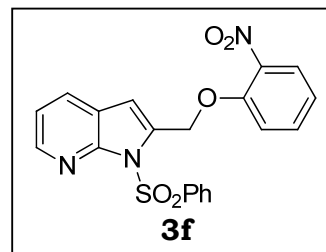

#### User Spectra

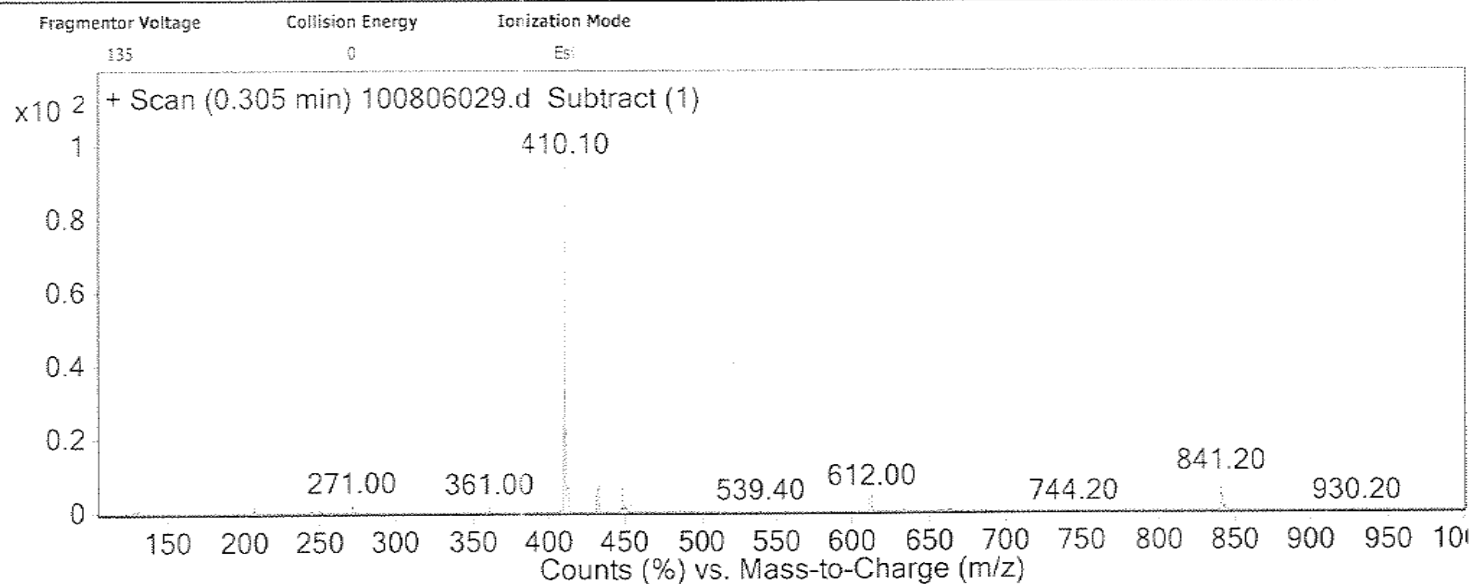

--- End Of Report ---

TDC-210-A472-MML-052 in CDCl<sub>3</sub>

AR.No:ME0810/112  
Analyst:Haribabu.R  
Date:2nd Aug 2010.

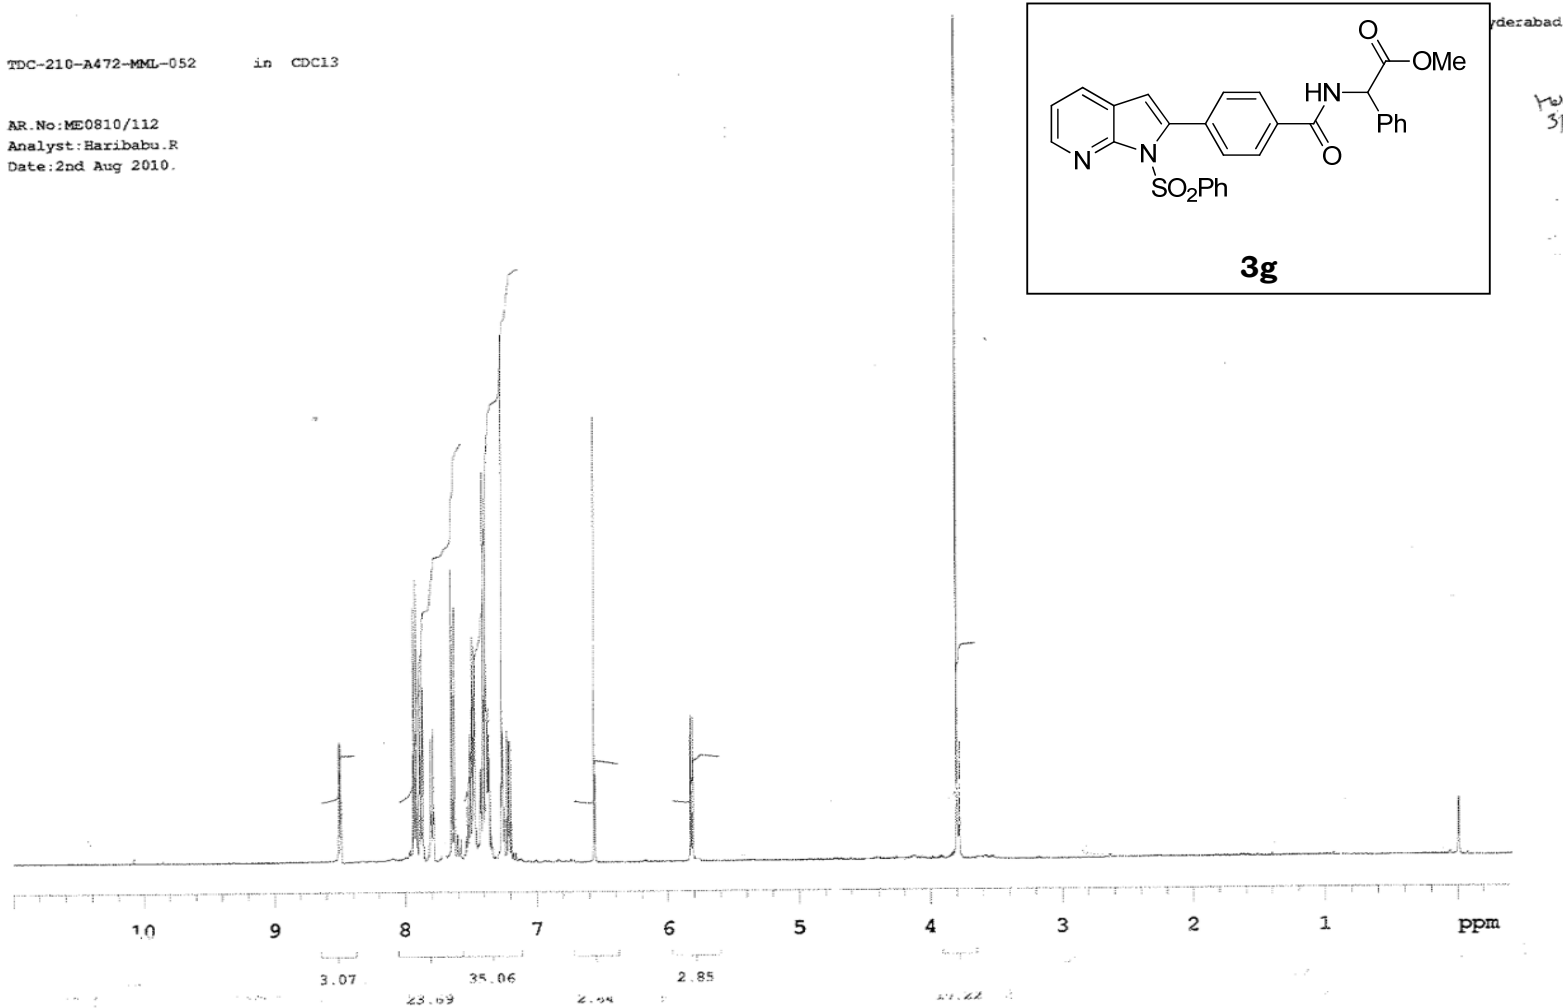

EDC-210-A472-MML-052 in CDCl<sub>3</sub>

AR.No:ME0810/479  
Analyst:Haribabu.R  
Date:5th Aug 2010.

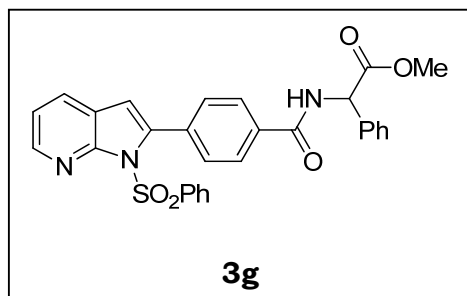

AR&D, Aurigene Discovery Technologies Pvt. Ltd., Hyderabad  
Instrument : Mercury Plus (Varian 400MHz)  
Date & Time : Fri Aug 6 07:04:35 IST 2010  
Recorded By : Haribabu.R

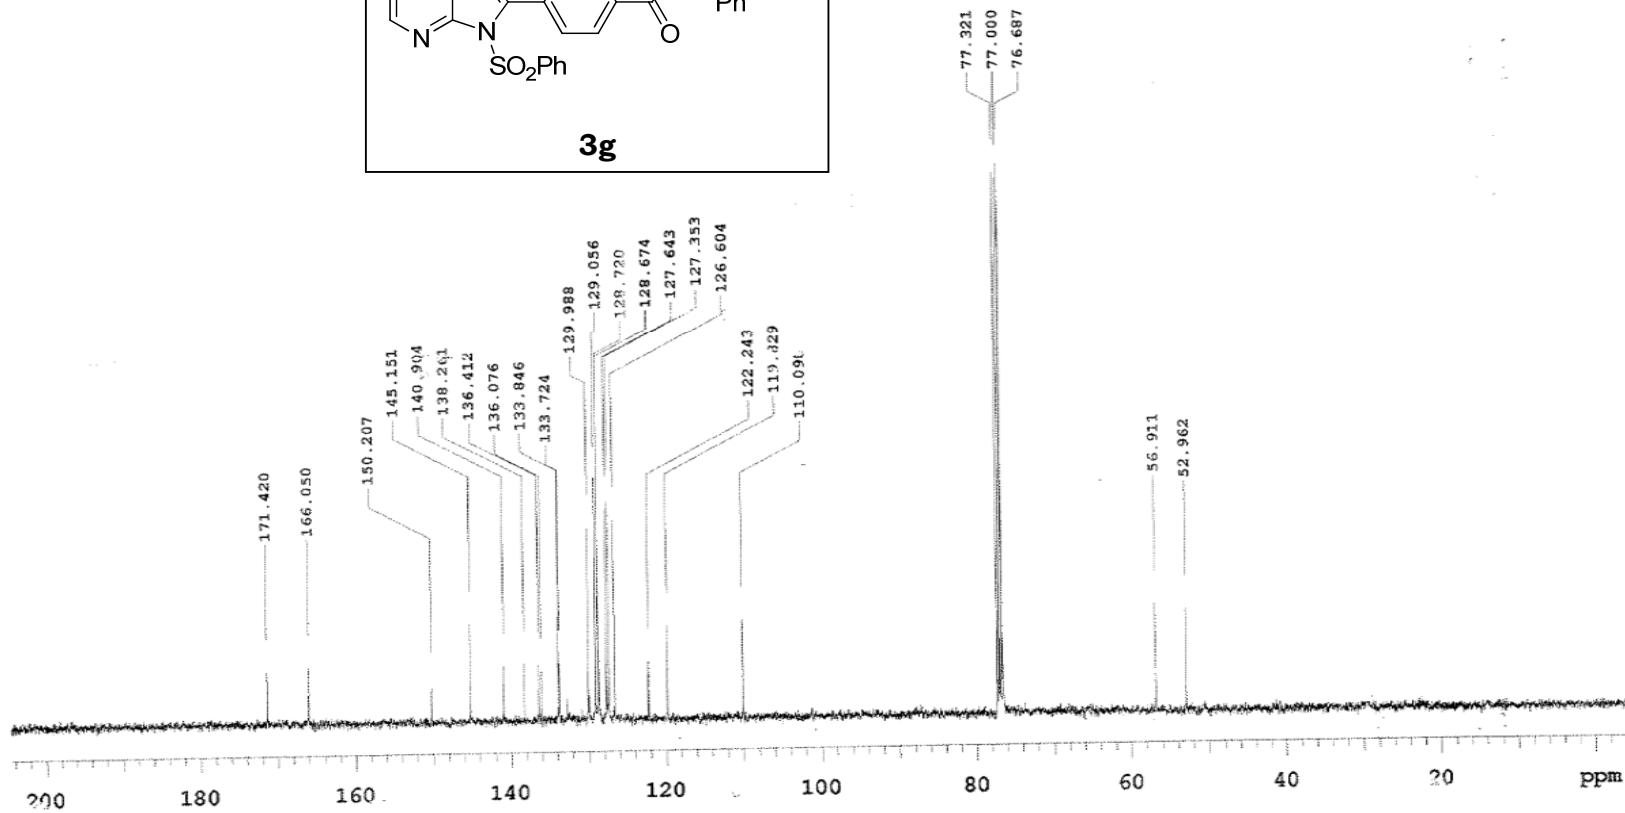



CPS.MIYAPUR

## Mass Analysis Report

|                 |              |                        |              |
|-----------------|--------------|------------------------|--------------|
| Data Filename   | 100806028.d  | Sample Name            | A472/MML/052 |
| Sample Type     | Sample       | Position               | Vial 41      |
| Instrument Name | Instrument 1 | User Name              |              |
| Acq Method      | ESI.m        | IRM Calibration Status | Success      |
| DA Method       | default.m    | Comment                |              |

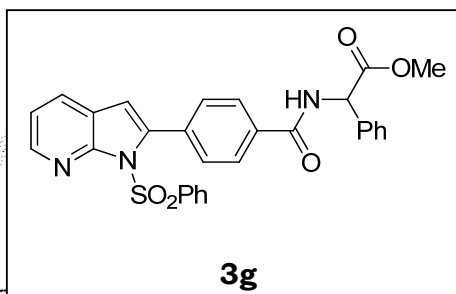

### User Spectra

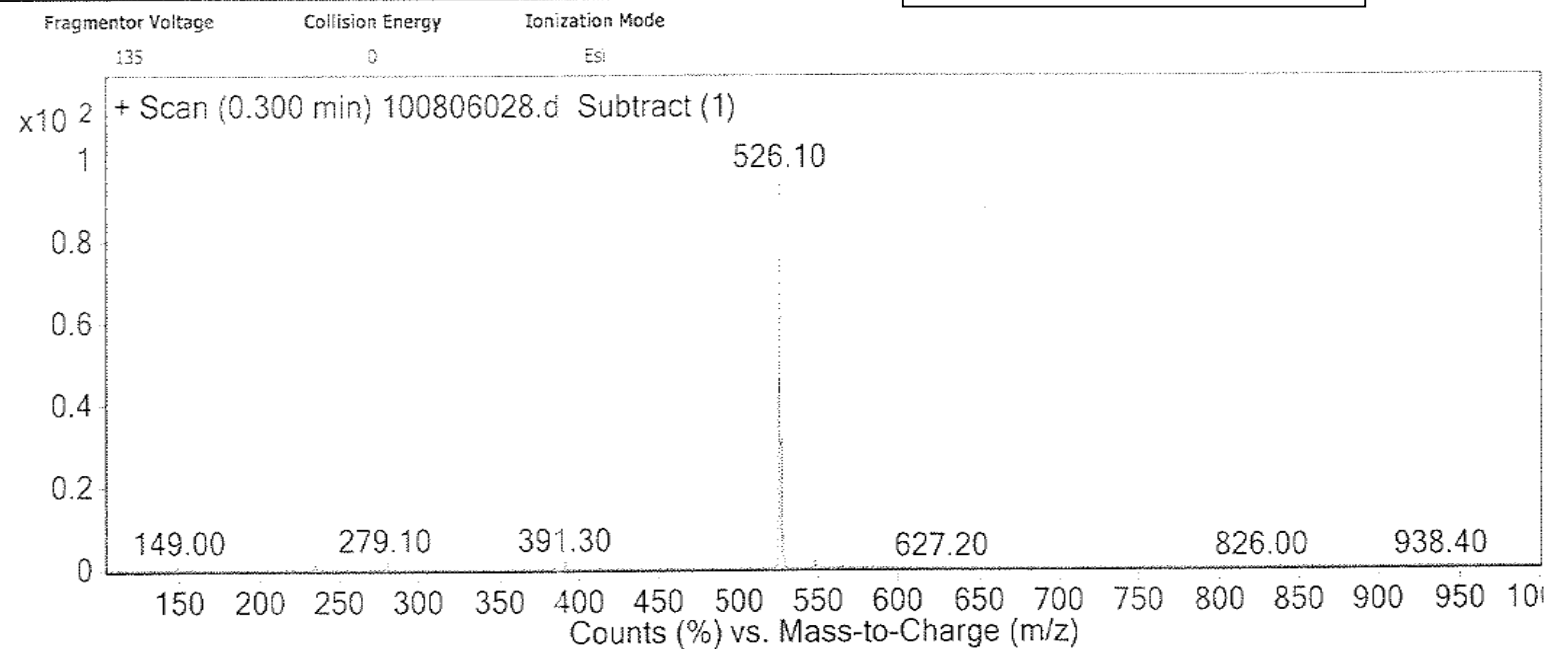

--- End Of Report ---

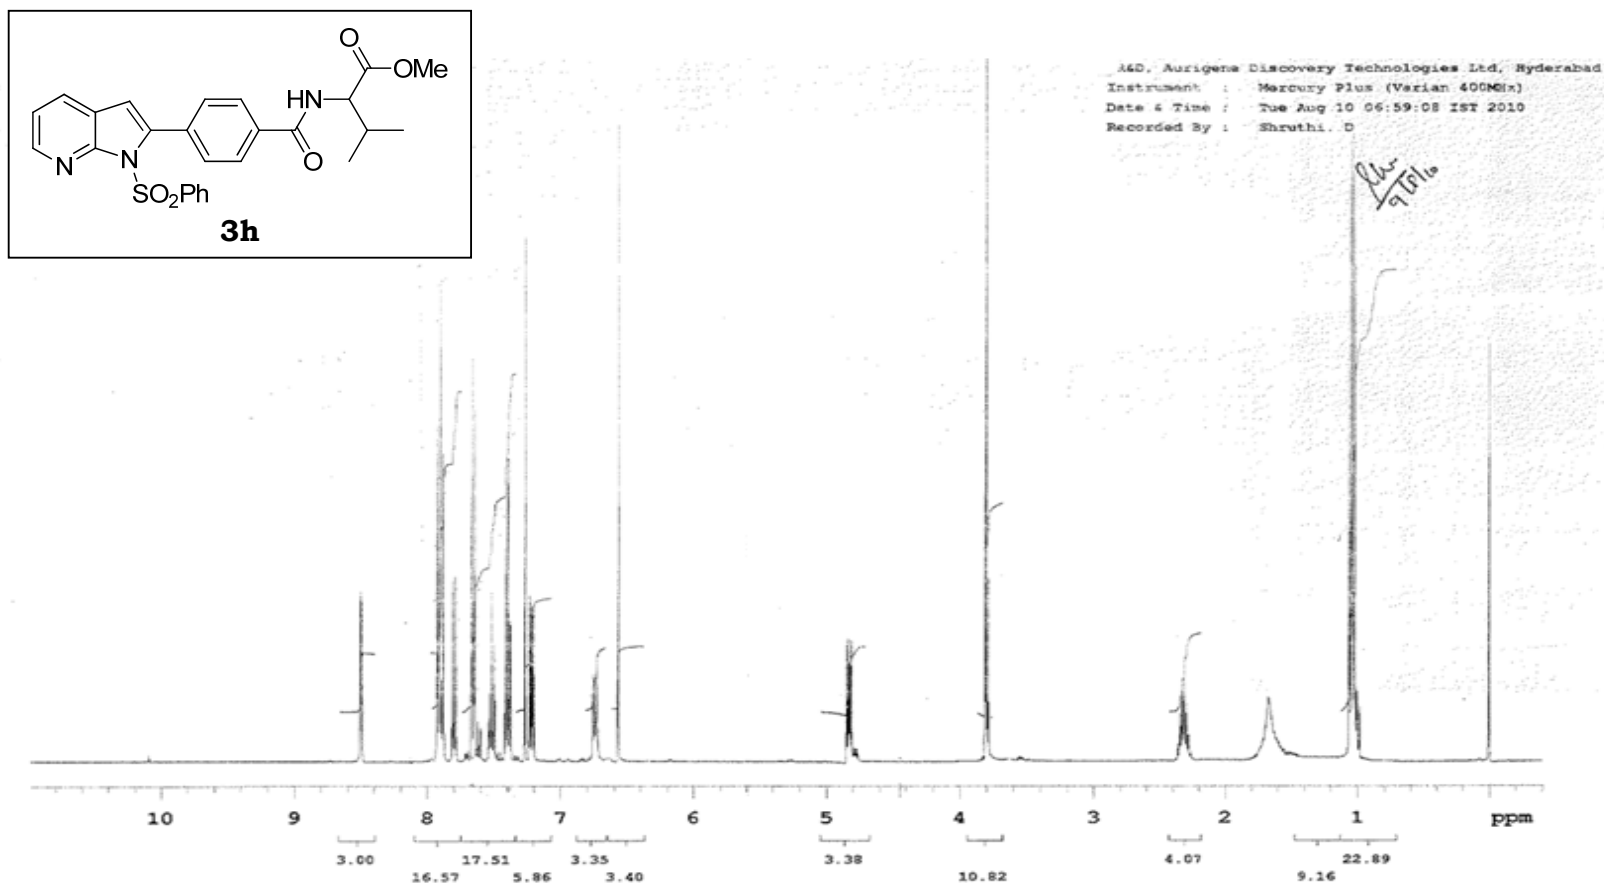

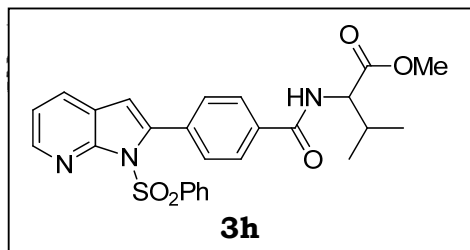

AR&D, Aurigene Discovery Technologies Ltd.  
Instrument : Mercury Plus (Varian 400MHz)  
Date & Time : Tue Aug 31 08:50:20 GMT 2010  
Recorded By : HariBabu.R

*Handwritten signature*  
30/8/10

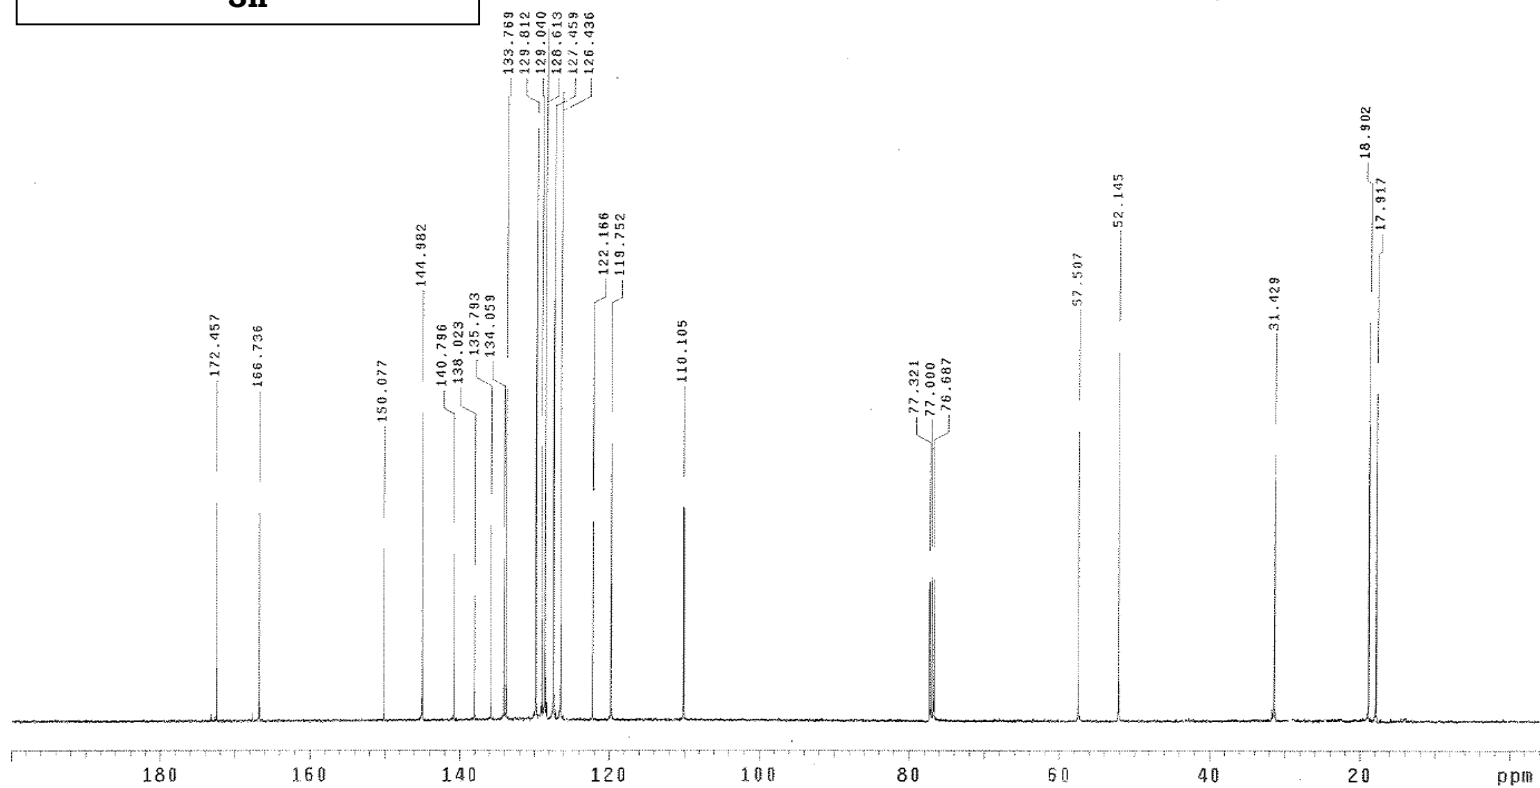

CPS.MIYAPUR

### Mass Analysis Report

|                 |              |                        |              |
|-----------------|--------------|------------------------|--------------|
| Data Filename   | 100810002.d  | Sample Name            | A472/MML/054 |
| Sample Type     | Sample       | Position               | Vial S2      |
| Instrument Name | Instrument 1 | User Name              |              |
| Acq Method      | ESI.m        | IRM Calibration Status | Success      |
| DA Method       | default.m    | Comment                |              |

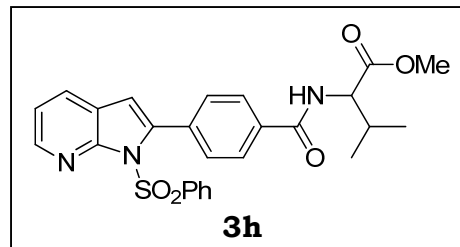

#### User Spectra

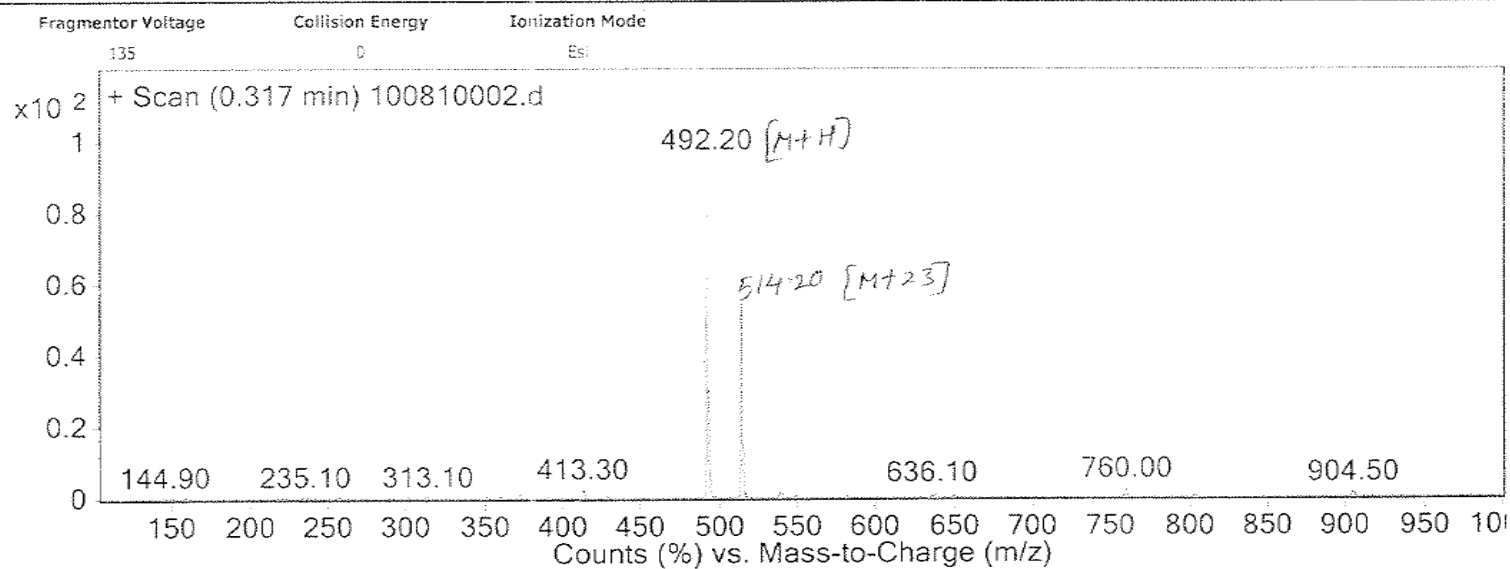

--- End Of Report ---

TDC-210 A472-MML-063F1 in CDCl<sub>3</sub>

AR.No:ME0910/1385  
Analyst:Haribabu.R  
Date:17 th Aug 2010

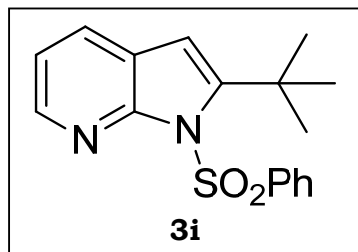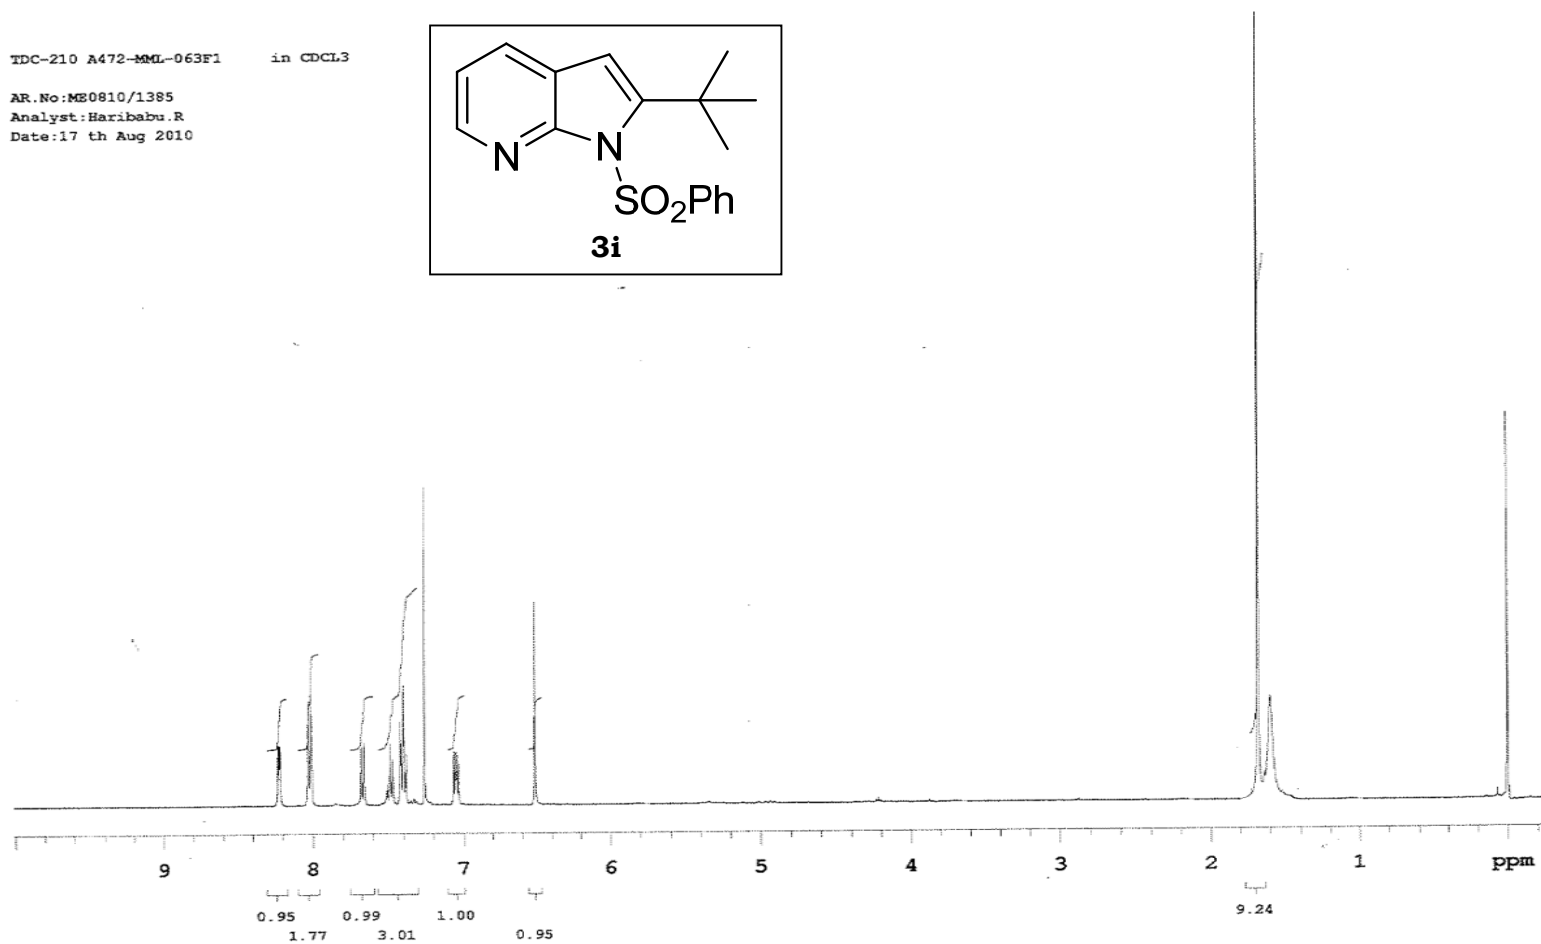

F18

A472-MML-063-F1 in CDCl<sub>3</sub>  
TDC-J 002

AR NO:GE0810/41  
Analyst:Haribabu.R  
Date: 18 th Aug.2010

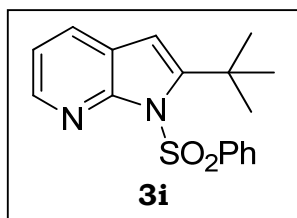

AR&D, Auxigene Discovery Technologies Ltd, Hyderabad  
Instrument : Mercury Plus (Varian 400MHz)  
Date & Time : Sat Aug 21 11:20:20 IST 2010  
Recorded By : Haribabu.R

WJG

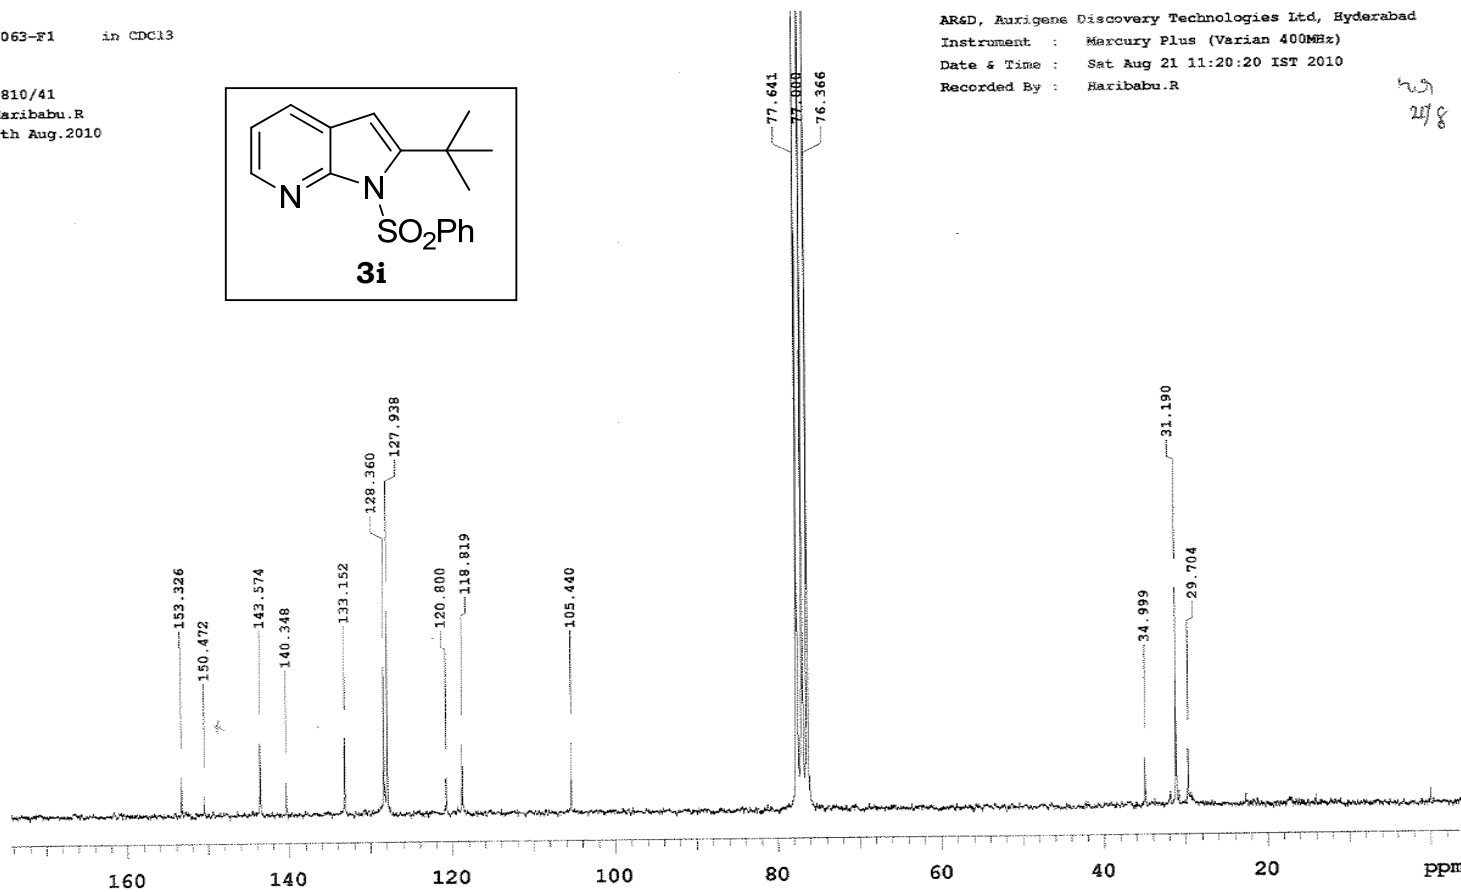

CPS,MIYAPUR

## Mass Analysis Report

|                 |              |                        |                 |
|-----------------|--------------|------------------------|-----------------|
| Data Filename   | 100819004.d  | Sample Name            | A472/MML/063-F1 |
| Sample Type     | Sample       | Position               | Vial 34         |
| Instrument Name | Instrument 1 | User Name              |                 |
| Acq Method      | ESL.m        | IRM Calibration Status | Success         |
| DA Method       | default.m    | Comment                |                 |

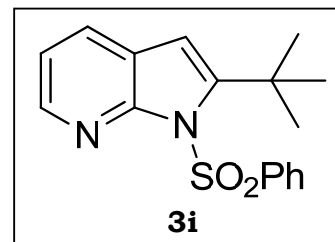

### User Spectra

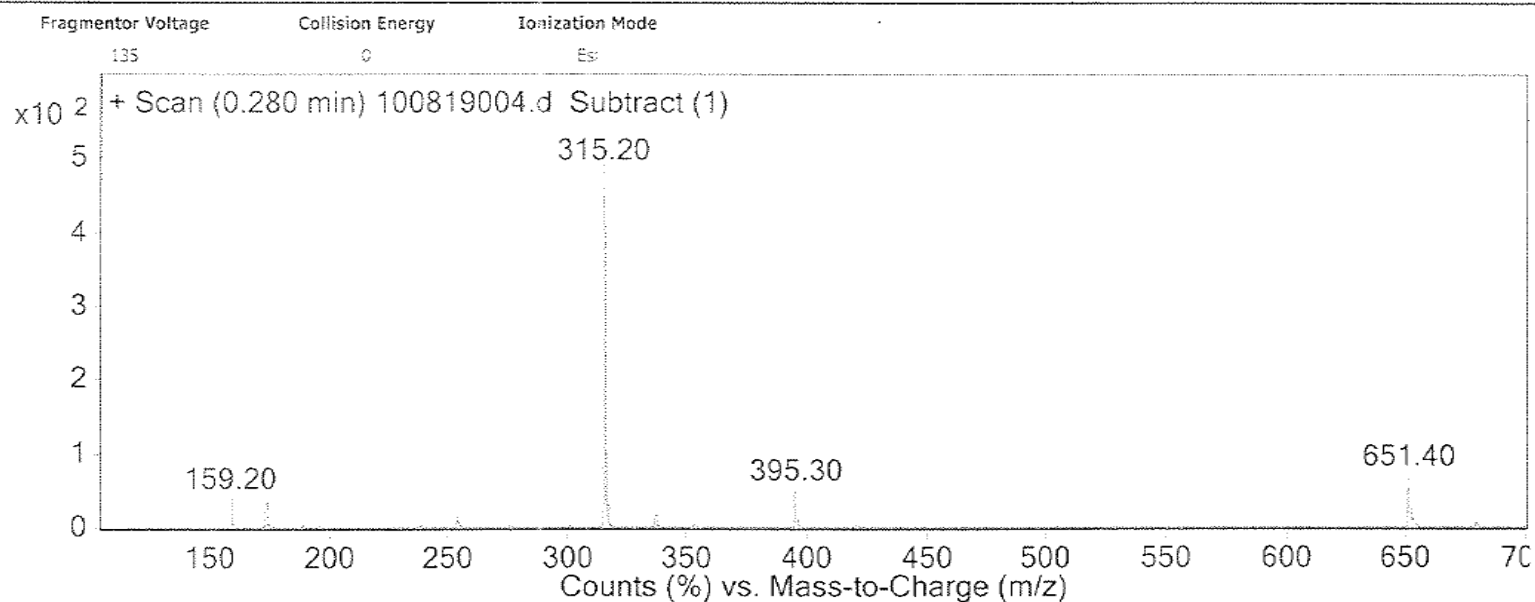

--- End Of Report ---

TDC-210 A472-NML-066 in CDCL<sub>3</sub>

AR.No:ME0810/2160  
NMR:400MHz  
Analyst:Shruthi  
Date:26th Aug 2010

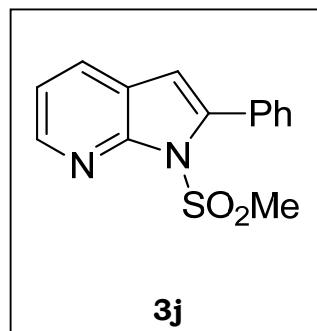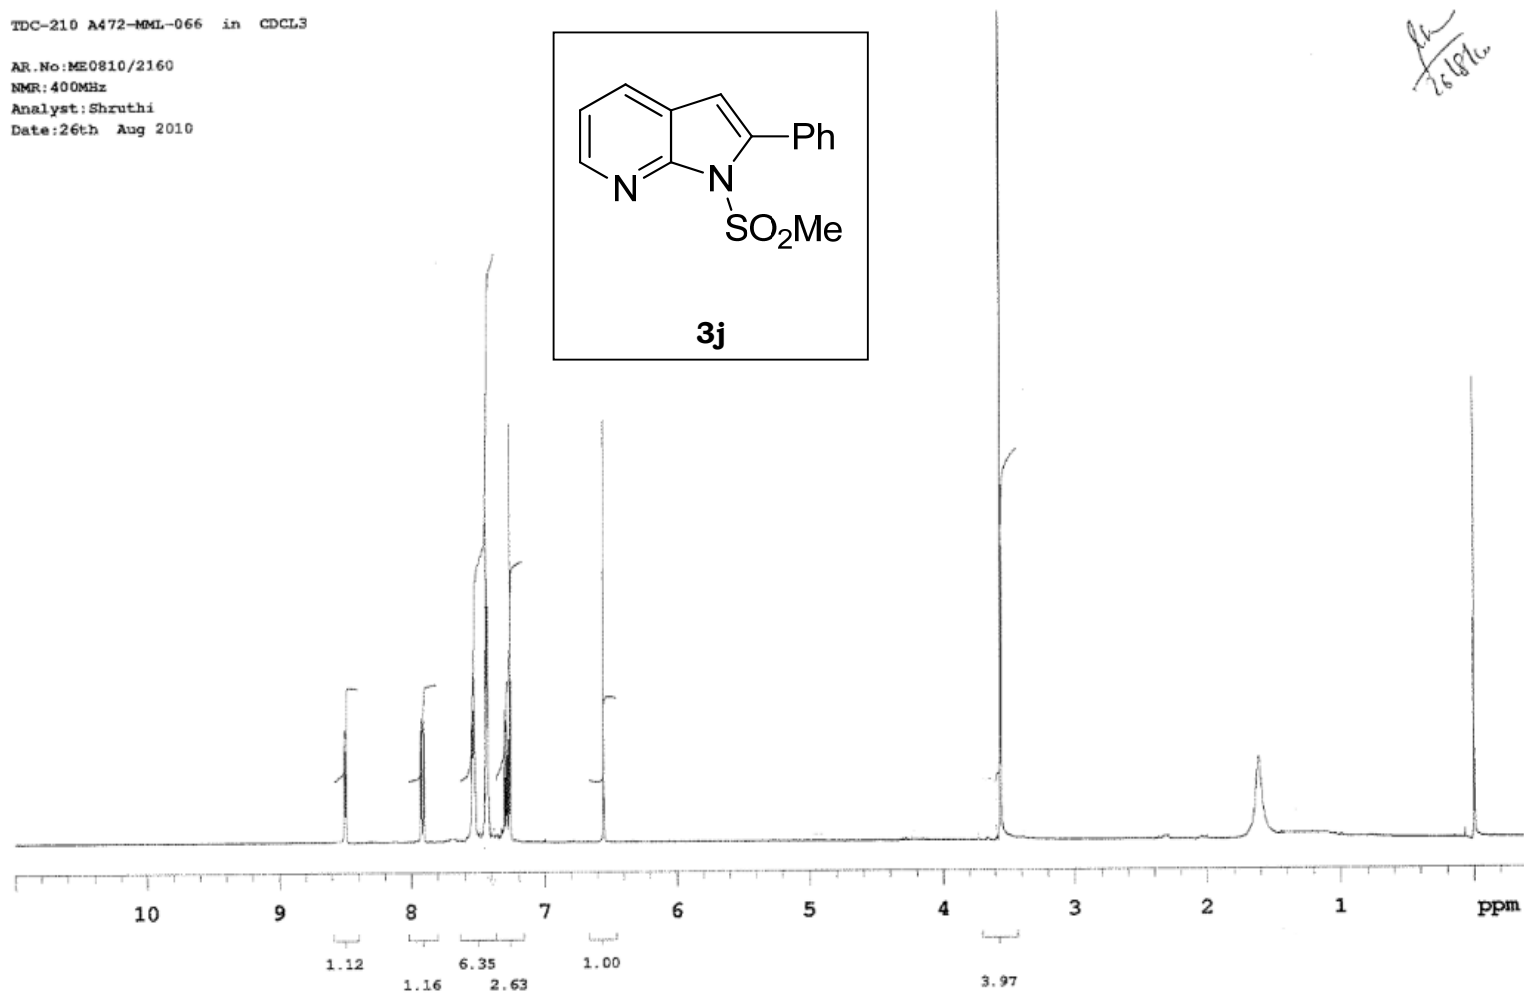



TDC-210 A472-MML-066 in CDCl<sub>3</sub>

AR.No:ME0810/2374  
Date: 31st Aug, 2010  
Analyst:Shruthi

Analytical Research, Discovery Research, DRL  
Instrument : Mercury Plus (Varian 400MHz)  
Date & Time : Tue Aug 31 13:22:48 GMT 2010  
Recorded By : Shruthi. D

*Handwritten signature*  
31/8/10

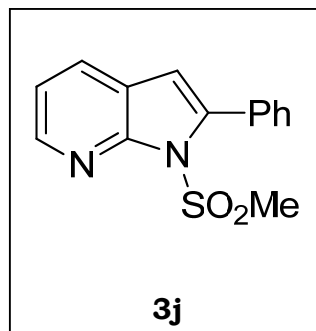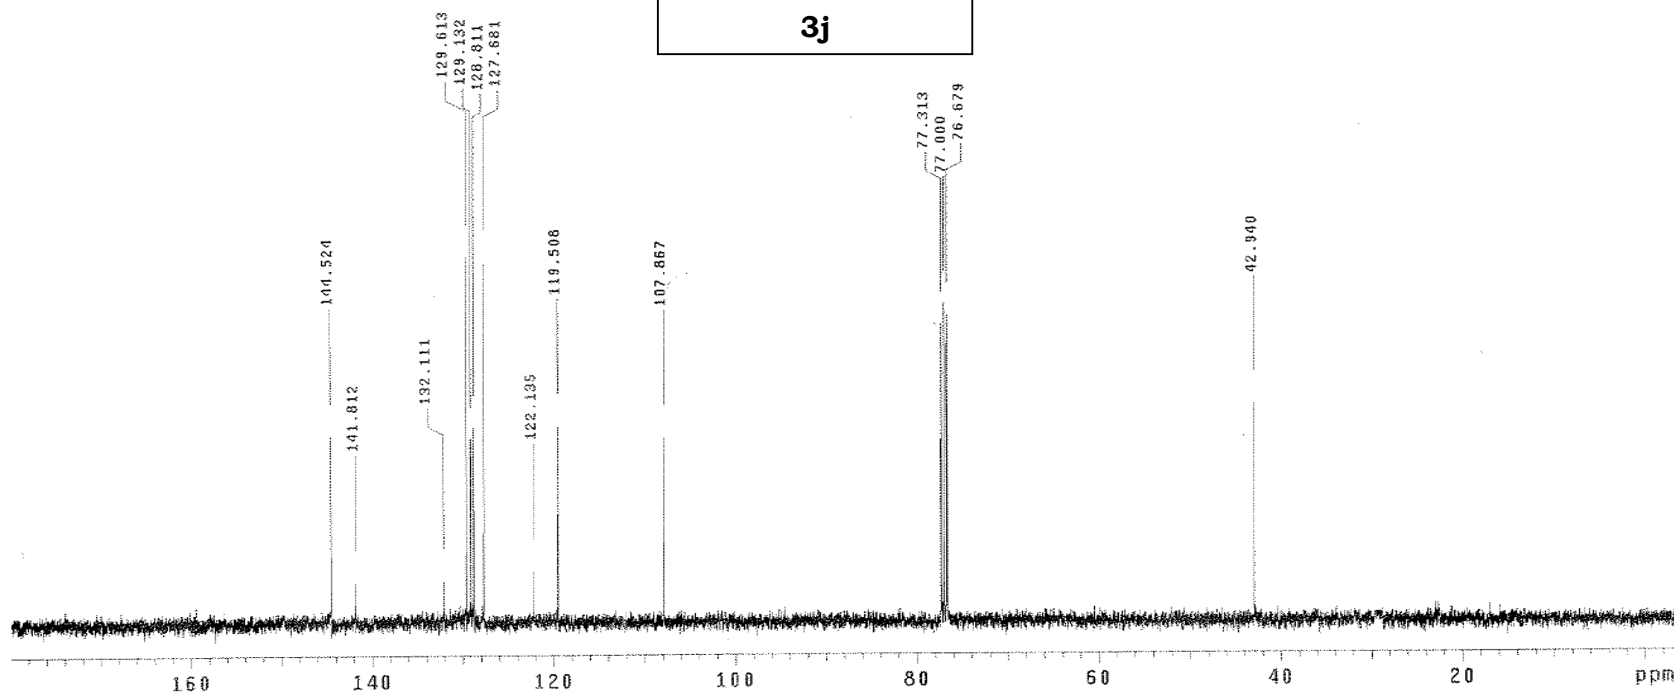

CPS.MIYAPUR

## Mass Analysis Report

|                 |              |                        |              |
|-----------------|--------------|------------------------|--------------|
| Data Filename   | 100626014.d  | Sample Name            | A472/MML/066 |
| Sample Type     | Sample       | Position               | Vial 43      |
| Instrument Name | Instrument 1 | User Name              |              |
| Acq Method      | ESI.m        | IRM Calibration Status | Success      |
| DA Method       | default.m    | Comment                |              |

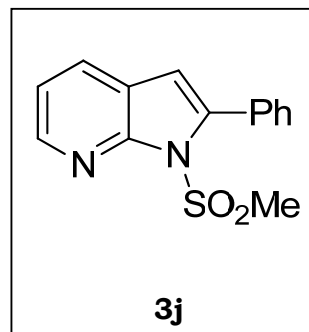

### User Spectra

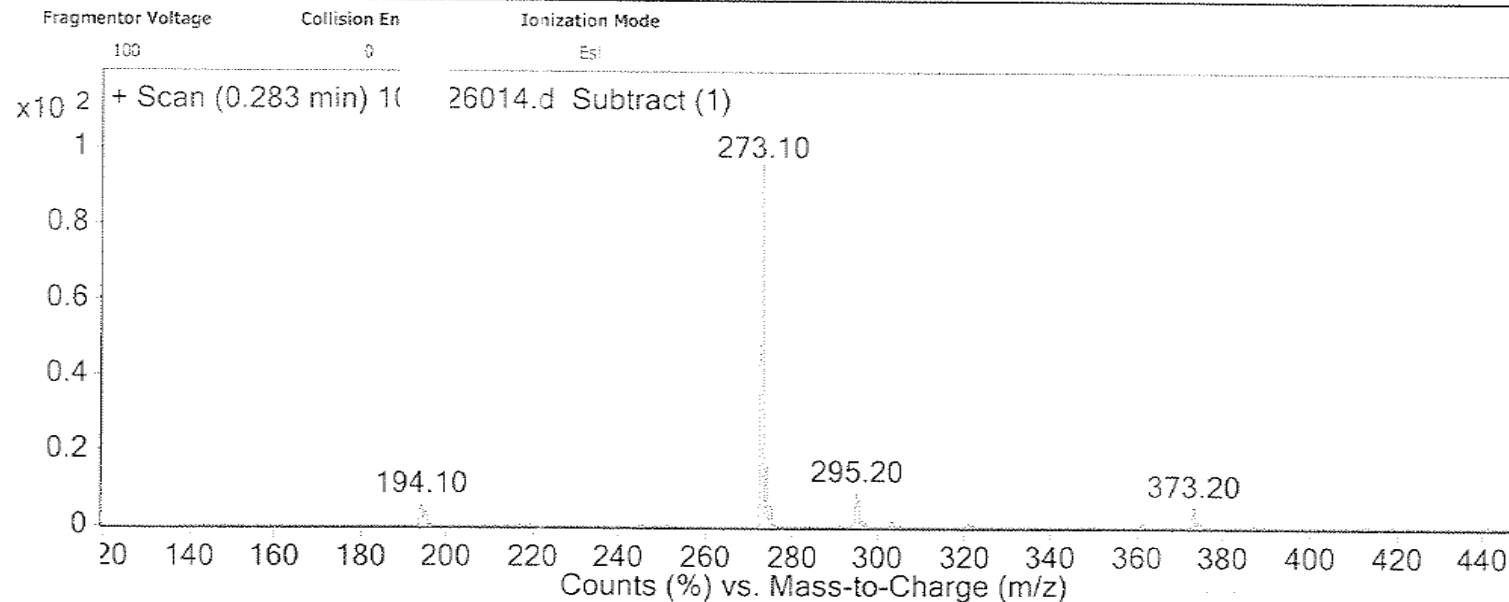

--- End Of Report ---

TDC-210 A472-NML-068 in CDCl<sub>3</sub>

AR.No:ME0810/2219  
NMR:400MHz  
Analyst:Haribabu.R  
Date:26th Aug 2010

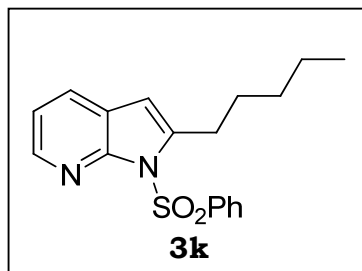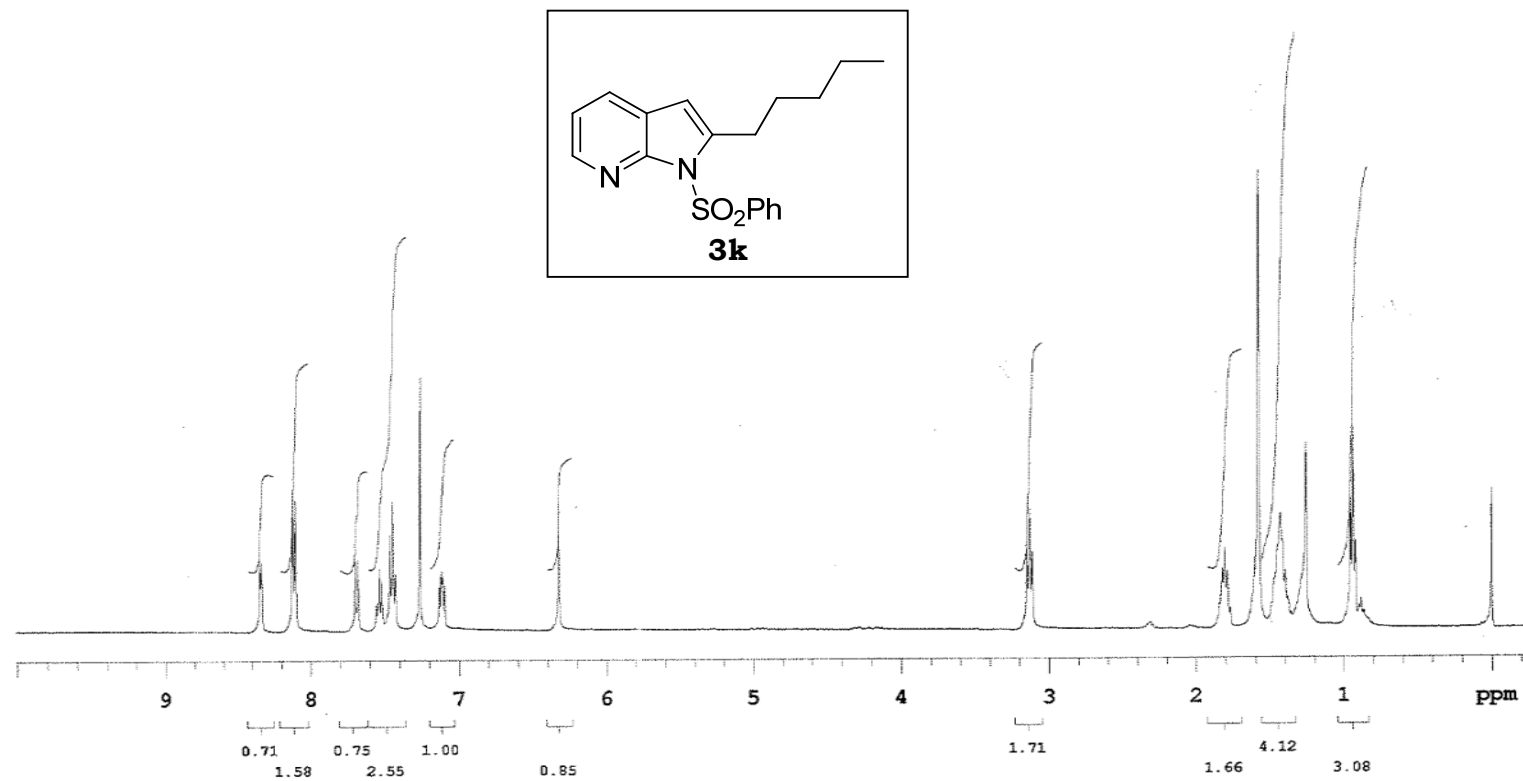

TDC-210 A472-MML-068 in CDC13

AR.No:ME0810/2549  
Date: 31st Aug. 2010  
Analyst:Haribabu.R

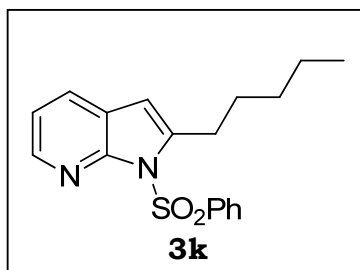

AR&D, Aurigene Discovery Technologies Ltd.  
Instrument : Mercury Plus (Varian 400MHz)  
Date & Time : Thu Sep 2 09:14:44 GMT 2010  
Recorded By : Haribabu.R

Har  
31/8

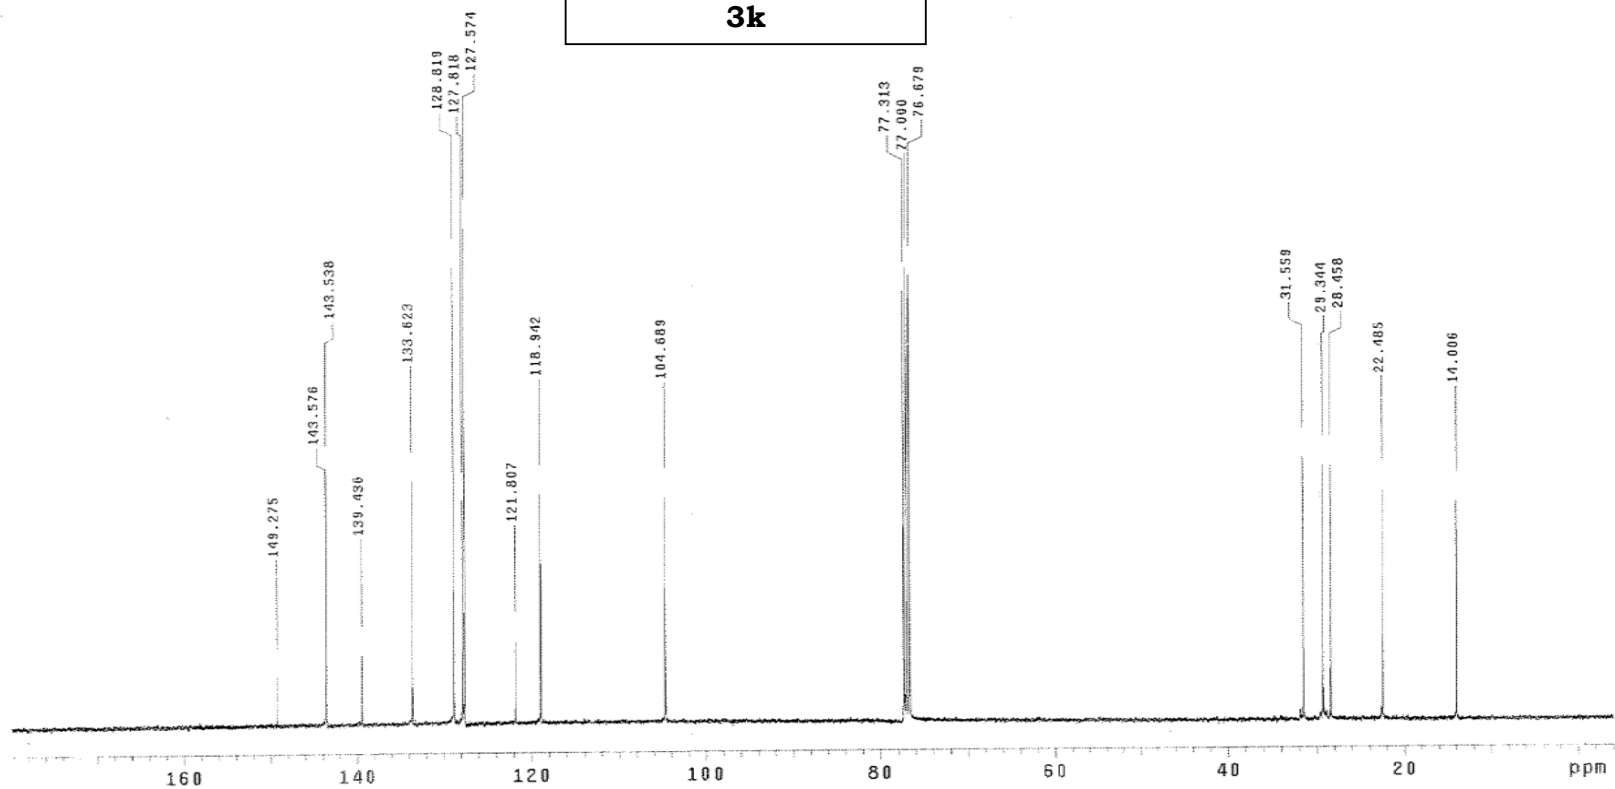

CPS.MIYAPUR

## Mass Analysis Report

|                 |              |                        |              |
|-----------------|--------------|------------------------|--------------|
| Data Filename   | 100830015.d  | Sample Name            | A472/MML/068 |
| Sample Type     | Sample       | Position               | Vial 15      |
| Instrument Name | Instrument 1 | User Name              |              |
| Acq Method      | ESI.m        | IRM Calibration Status | Success      |
| DA Method       | default.m    | Comment                |              |

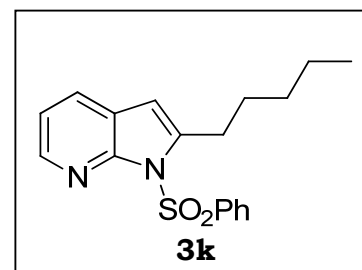

### User Spectra

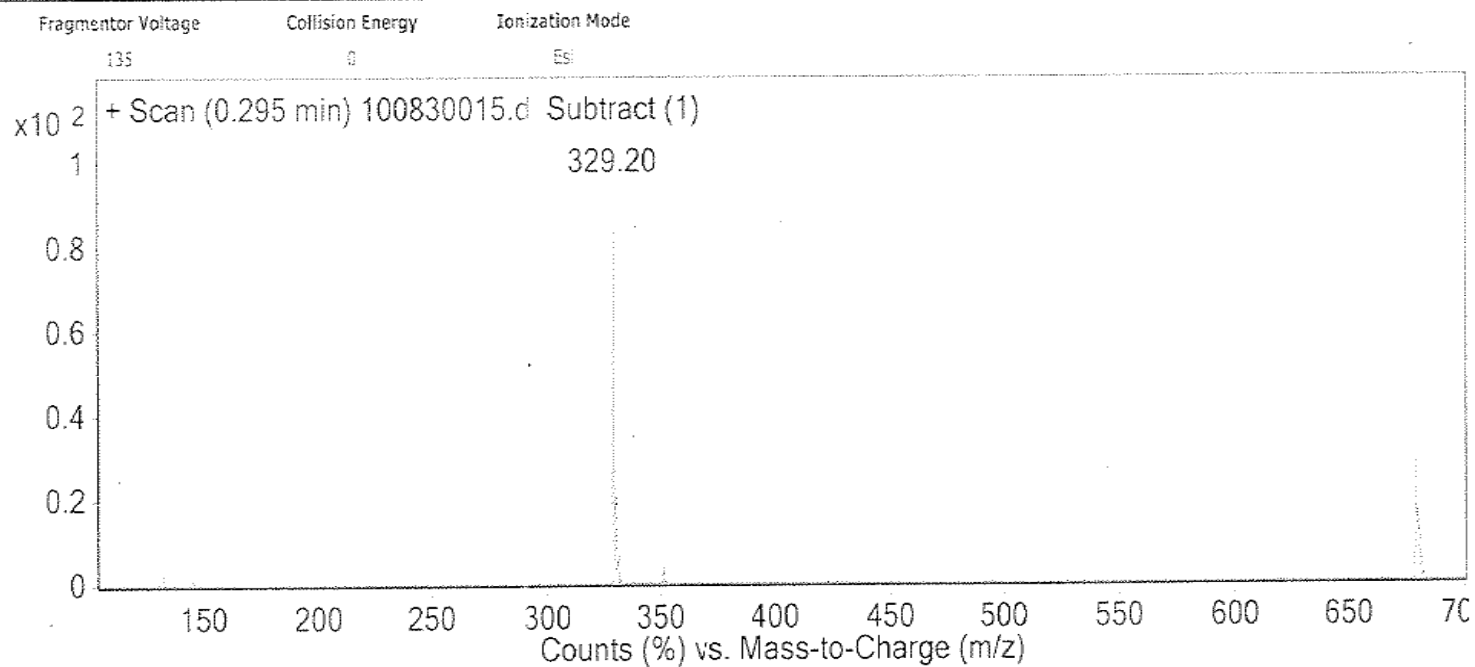

--- End Of Report ---

248

TDC-210 A472-MML-070 in CDCl<sub>3</sub>

AR. No: ME0810/2218  
NMR: 400MHz  
Analyst: Haribabu.R  
Date: 26th Aug 2010

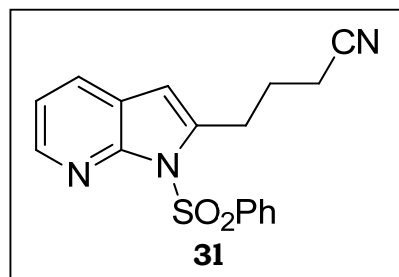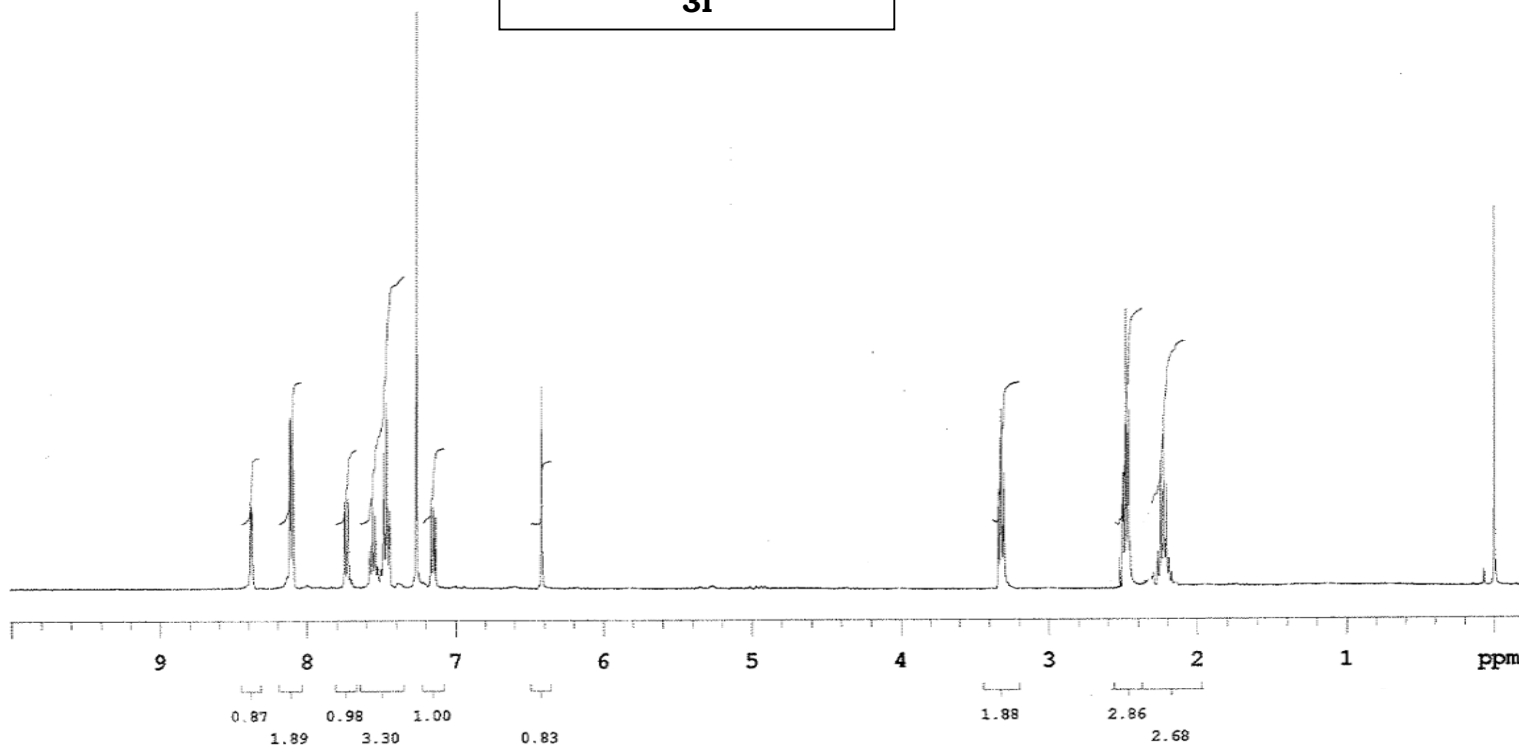

TDC-210 A472-MML-070 in CDCl<sub>3</sub>

AR.No: ME0910/83  
Date: 3rd Sept 2010  
Analyst: Shruthi

AR&D, Aurigene Discovery Technologies Ltd.  
Instrument : Mercury Plus (Varian 400MHz)  
Date & Time : Fri Sep 3 10:01:20 GMT 2010  
Recorded By : HariBabu.R

*Handwritten signature*  
3/9/10

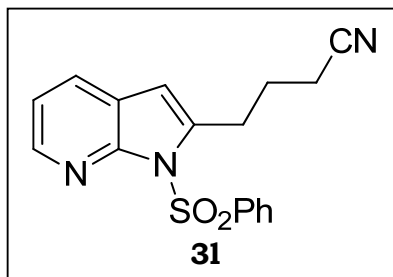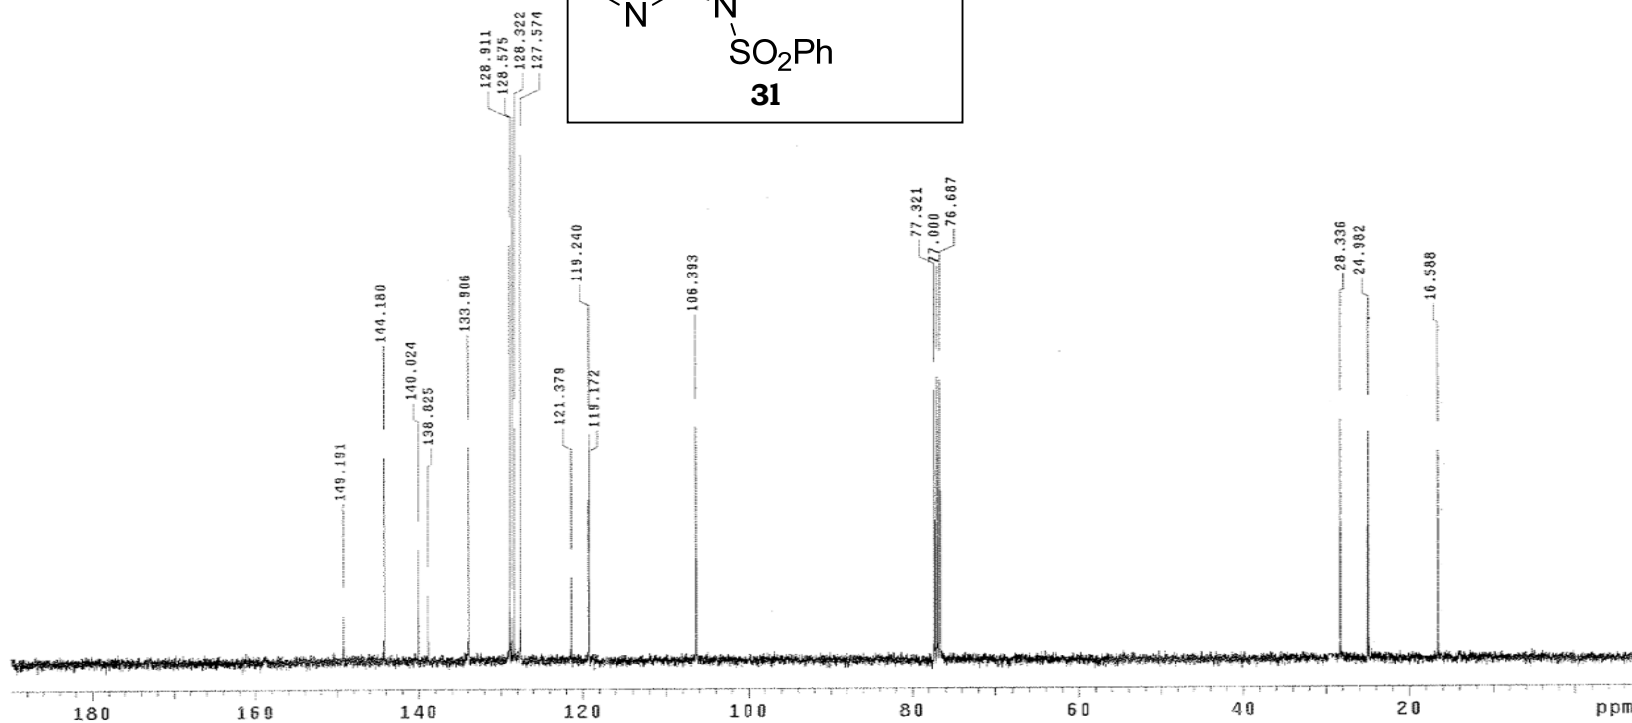

CPS.MIYAPUR

## Mass Analysis Report

|                 |              |                        |              |
|-----------------|--------------|------------------------|--------------|
| Data Filename   | 100830014.d  | Sample Name            | A472/MML/070 |
| Sample Type     | Sample       | Position               | Vial 14      |
| Instrument Name | Instrument 1 | User Name              |              |
| Acq Method      | ESI.m        | IRM Calibration Status | Success      |
| DA Method       | default.m    | Comment                |              |

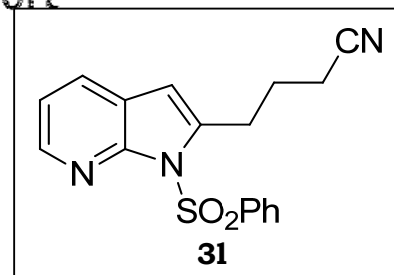

### User Spectra

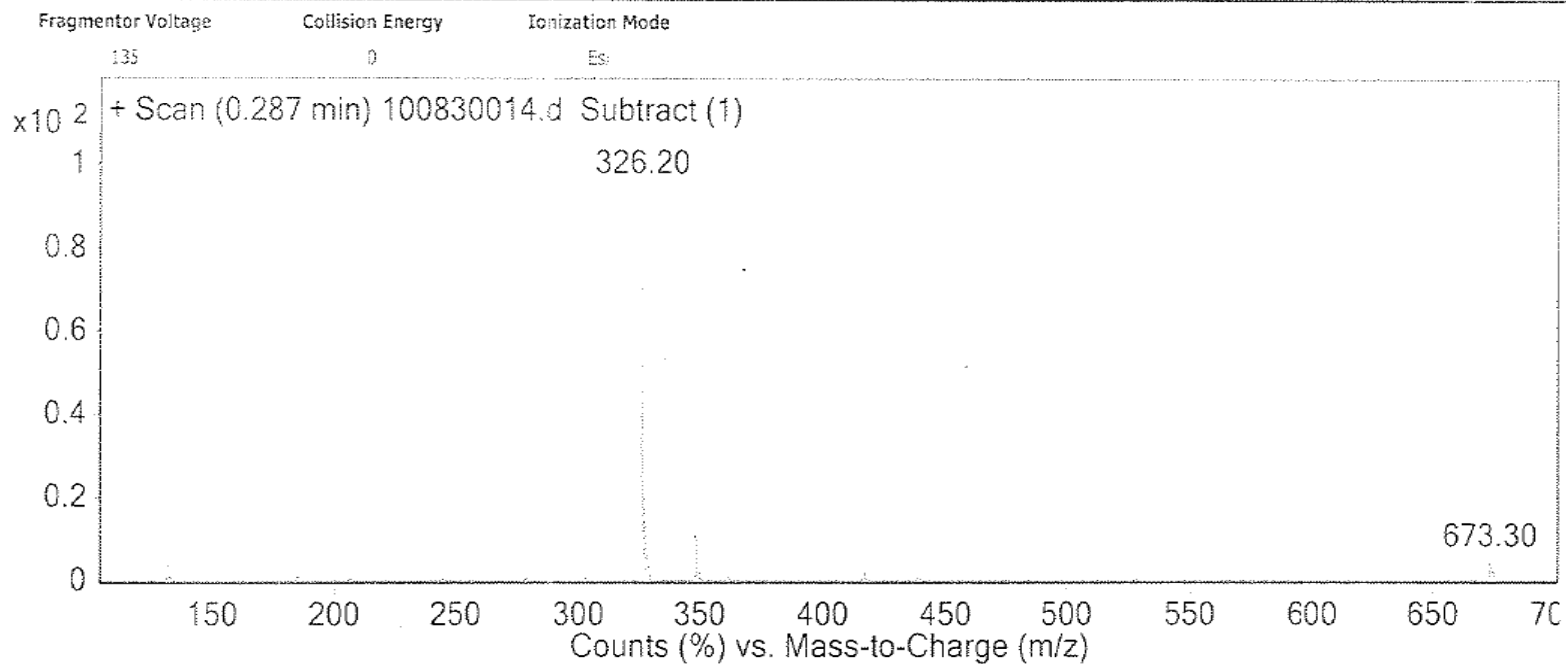

--- End Of Report ---



Mr  
G. P.

TDC-210-A570-CLEU3-011 in CDCl<sub>3</sub>

NMR-400

AR.No:ME0910/1768

Analyst:Shruthi

Date:29th Sept 2010

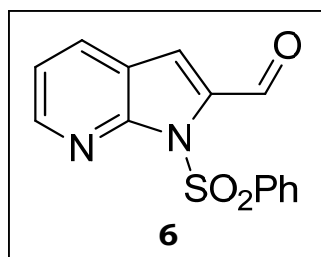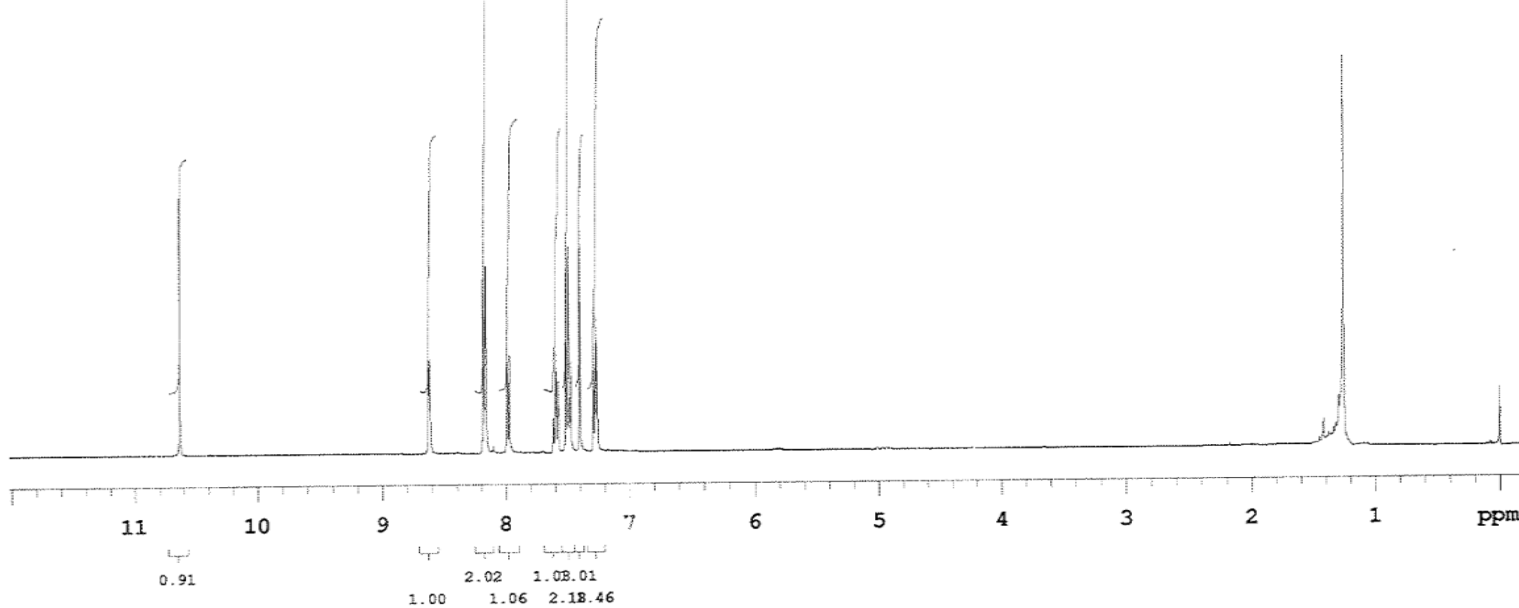

TDC-210 A570-CLEU3-011 in CDCL3

NMR-400

AR.No:ME1010/1580

Analyst:Shruthi

Date:15th Oct.2010

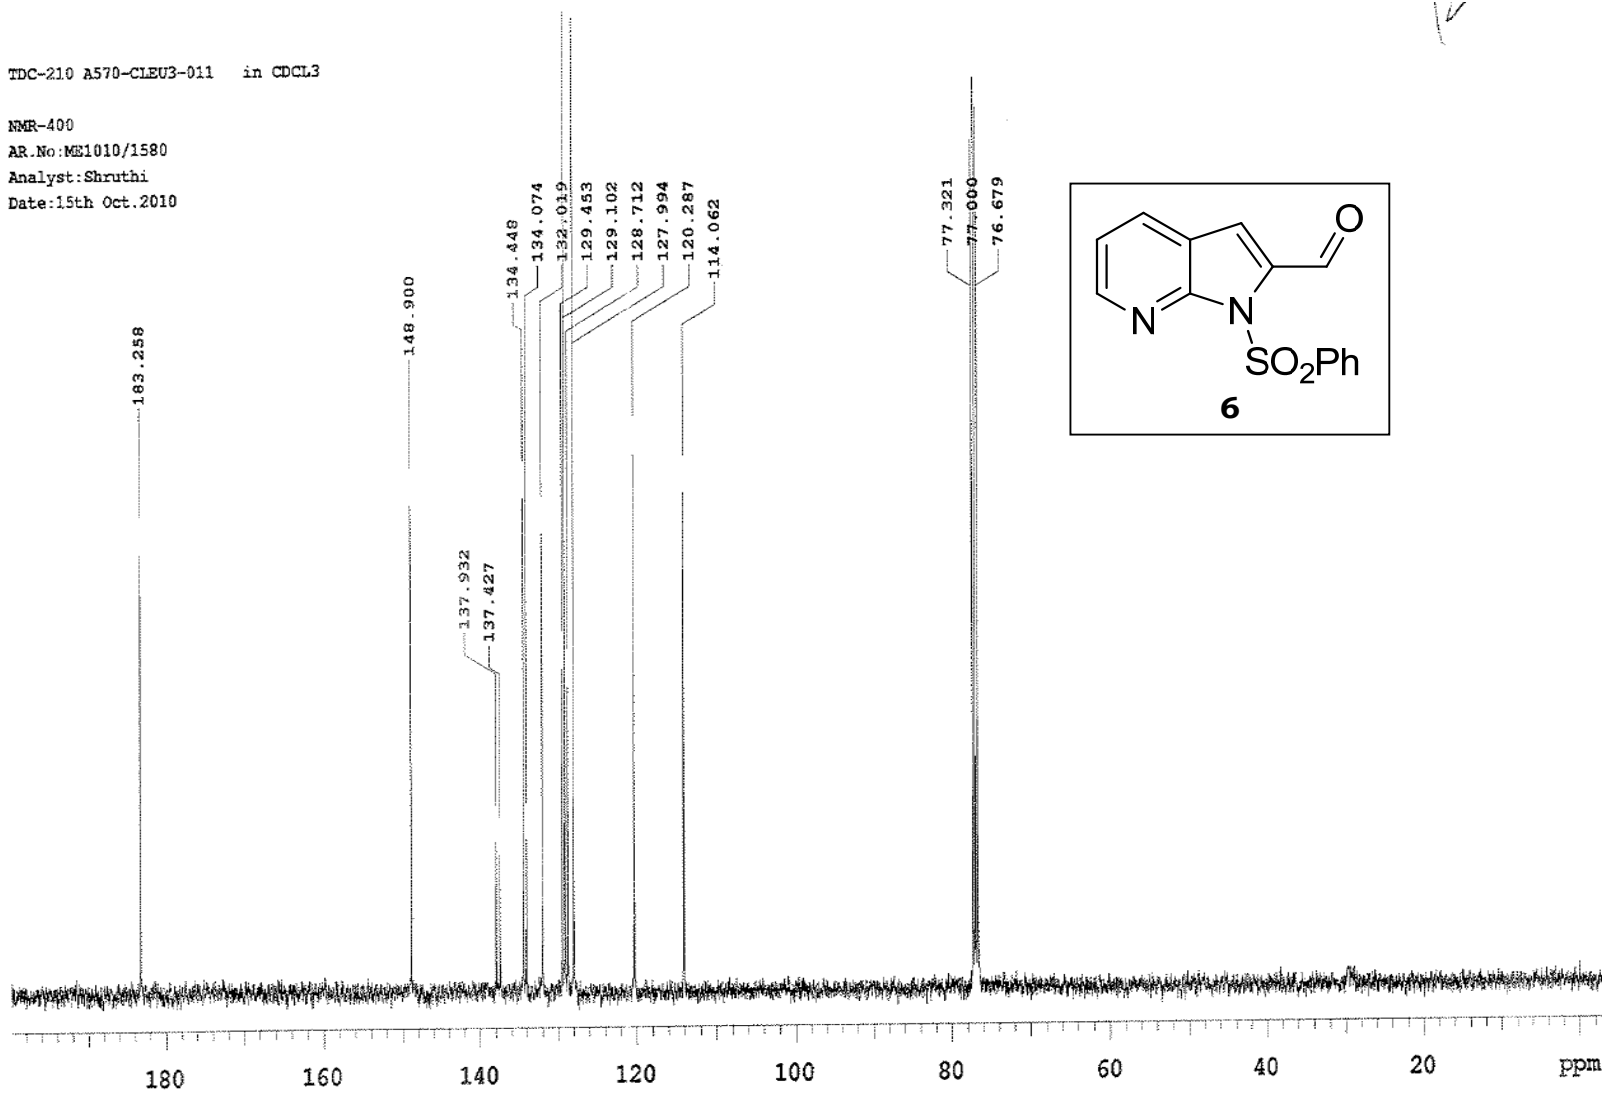

CPS.MIYAPUR

## Mass Analysis Report

|                 |              |                        |                |
|-----------------|--------------|------------------------|----------------|
| Data Filename   | 100929019.d  | Sample Name            | AS70/CLEU3/011 |
| Sample Type     | Sample       | Position               | Vial 19        |
| Instrument Name | Instrument 1 | User Name              |                |
| Acq Method      | ESI.m        | IRM Calibration Status | Success        |
| DA Method       | CDD-MRM.m    | Comment                |                |

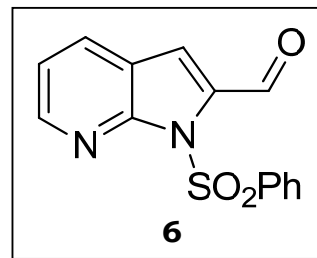

### User Spectra

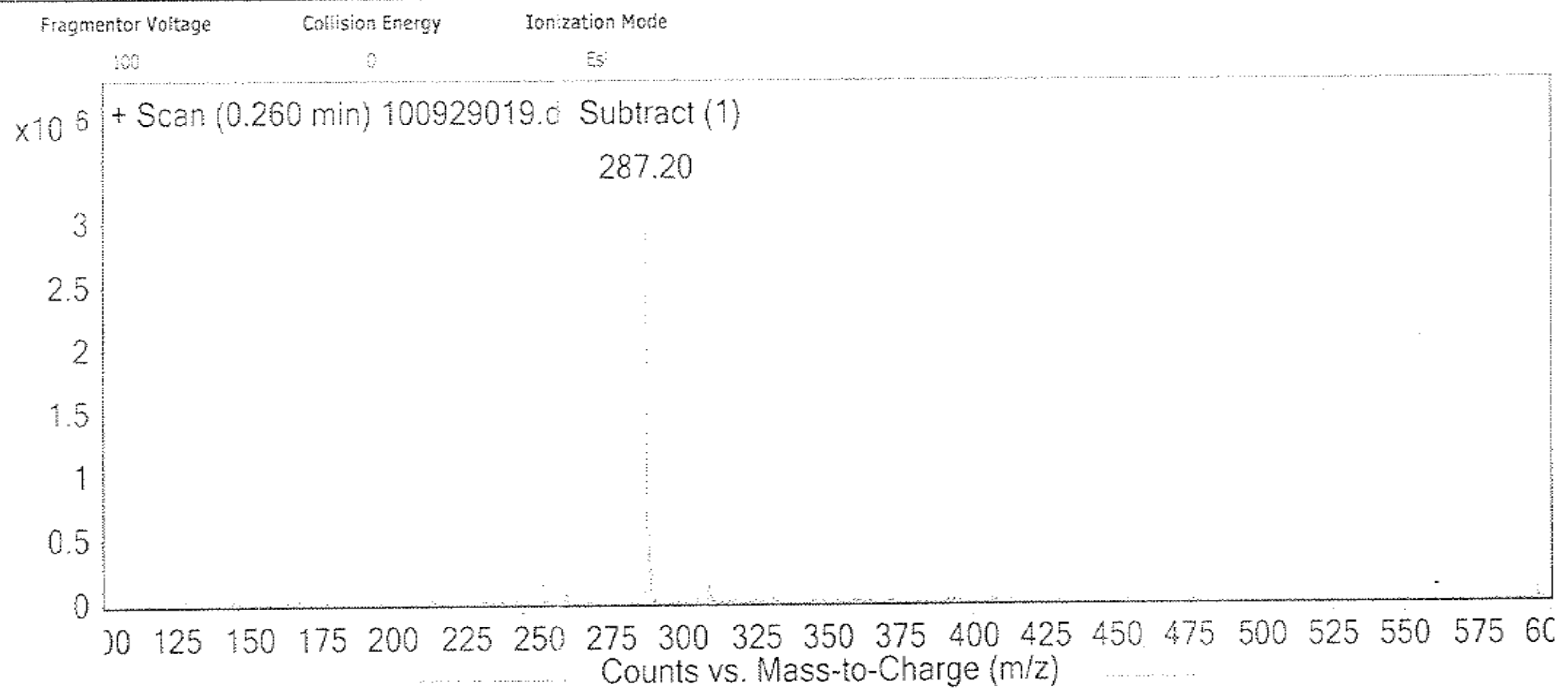

--- End Of Report ---
